# Supplementary material for: Association between phenotype and deletion size in 22q11.2 microdeletion syndrome: systematic review and meta-analysis
Source: Springer Nature journal article supplement (doi:10.1186/s13023-019-1170-x), 2019-08-09
Supplement: MOESM1 [file 17054286]

| Authors                                                                                                                     | Title                                                                                                                                                                                                              | Year | Source title                                             | Vol. | Page start | Page end | *FT/<br>T&A | Included/<br>excluded | Justification      |
|-----------------------------------------------------------------------------------------------------------------------------|--------------------------------------------------------------------------------------------------------------------------------------------------------------------------------------------------------------------|------|----------------------------------------------------------|------|------------|----------|-------------|-----------------------|--------------------|
| <b>Nugent N., McGillivray A., Earley M.J.</b>                                                                               | 22q11 chromosome abnormalities and the cleft service                                                                                                                                                               | 2010 | Journal of Plastic, Reconstructive and Aesthetic Surgery | 63   | 598        | 602      | T&A         | Excluded              | wrong outcome      |
| <b>Bassett A.S., Chow E.W.C.</b>                                                                                            | 22q11 deletion syndrome: A genetic subtype of schizophrenia                                                                                                                                                        | 1999 | Biological Psychiatry                                    | 46   | 882        | 891      | T&A         | Excluded              | wrong study design |
| <b>Squarcione C., Torti M.C., Di Fabio F., Biondi M.</b>                                                                    | 22q11 deletion syndrome: A review of the neuropsychiatric features and their neurobiological basis                                                                                                                 | 2013 | Neuropsychiatric Disease and Treatment                   | 9    | 1873       | 1883     | T&A         | Excluded              | wrong study design |
| <b>Ramírez-Cheyne J., Forero-Forero J.V., González-Teshima L.Y., Madrid A., Saldarriaga W.</b>                              | 22q11 deletion syndrome: embryology and diagnostic algorithm [Síndrome de delección 22q11: bases embriológicas y algoritmo diagnóstico]                                                                            | 2016 | Revista Colombiana de Cardiología                        | 23   | 443        | 452      | T&A         | Excluded              | wrong study design |
| <b>Cisarik F., Holubová V.</b>                                                                                              | 22q11 microdeletion in a group of patients selected according to the malformation spectrum of CATCH 22 syndrome [Mikrodelécia 22q11 v súbore pacientov vybraných podl'a spektra vývojových chýb syndrómu CATCH 22] | 2001 | Lekarsky Obzor                                           | 50   | 373        | 376      | T&A         | Excluded              | wrong outcome      |
| <b>Mercer-Rosa L., Paridon S.M., Fogel M.A., Rychik J., Tanel R.E., Zhao H., Zhang X., Yang W., Shults J., Goldmuntz E.</b> | 22q11.2 deletion status and disease burden in children and adolescents with tetralogy of Fallot                                                                                                                    | 2015 | Circulation: Cardiovascular Genetics                     | 8    | 74         | 81       | T&A         | Excluded              | wrong outcome      |
| <b>Rosa R.F.M., Zen P.R.G., Graziadio C., Paskulin G.A.</b>                                                                 | 22q11.2 deletion syndrome and congenital heart defects [Síndrome de deleção 22q11.2 e cardiopatias congênicas]                                                                                                     | 2011 | Revista Paulista de Pediatria                            | 29   | 251        | 260      | T&A         | Excluded              | wrong study design |
| <b>Antshel K.M., Kates W.R., Roizen N., Fremont W., Shprintzen R.J.</b>                                                     | 22q11.2 Deletion Syndrome: Genetics, neuroanatomy and cognitive/behavioral features                                                                                                                                | 2005 | Child Neuropsychology                                    | 11   | 5          | 19       | T&A         | Excluded              | wrong study design |

|                                                                                                                                                                                                             |                                                                                                                                              |      |                                    |    |      |      |     |          |                    |
|-------------------------------------------------------------------------------------------------------------------------------------------------------------------------------------------------------------|----------------------------------------------------------------------------------------------------------------------------------------------|------|------------------------------------|----|------|------|-----|----------|--------------------|
| <b>Garavelli L., Rosato S., Wischmeijer A., Gelmini C., Esposito A., Mazzanti L., Franchi F., De Crescenzo A., Palumbo O., Carella M., Riccio A.</b>                                                        | 22q11.2 distal deletion syndrome: Description of a new case with truncus arteriosus type 2 and review                                        | 2011 | Molecular Syndromology             | 2  | 35   | 44   | T&A | Excluded | wrong study design |
| <b>Ben-Shachar S., Ou Z., Shaw C.A., Belmont J.W., Patel M.S., Hummel M., Amato S., Tartaglia N., Berg J., Sutton V.R., Lalani S.R., Chinault A. , Cheung S.W., Lupski J.R., Patel A.</b>                   | 22q11.2 Distal Deletion: A Recurrent Genomic Disorder Distinct from DiGeorge Syndrome and Velocardiofacial Syndrome                          | 2008 | American Journal of Human Genetics | 82 | 214  | 221  | T&A | Excluded | wrong topic        |
| <b>Kim H.J., Jo H.S., Yoo E.-G., Chung I.H., Kim S.W., Lee K.H., Chang Y.H.</b>                                                                                                                             | 22q11.2 Microduplication with thyroid hemiagenesis                                                                                           | 2013 | Hormone Research in Paediatrics    | 79 | 243  | 249  | T&A | Excluded | wrong topic        |
| <b>Koç A., Karaer K., Ergün M.A., Yirmibeş-Karaoğuz M., Kan D., Cansu A., Perçin F.</b>                                                                                                                     | A case with a ring chromosome 22                                                                                                             | 2008 | Turkish Journal of Pediatrics      | 50 | 193  | 196  | T&A | Excluded | wrong topic        |
| <b>Daw S.C.M., Taylor C., Kraman M., Call K., Mao J.-I., Schuffenhauer S., Meitinger T., Lipson T., Goodship J., Scambler P.</b>                                                                            | A common region of 10p deleted in DiGeorge and velocardiofacial syndromes                                                                    | 1996 | Nature Genetics                    | 13 | 458  | 460  | T&A | Excluded | wrong outcome      |
| <b>Campbell L.E., Stevens A., Daly E., Toal F., Azuma R., Karmiloff-Smith A., Murphy D.G.M., Murphy K.C.</b>                                                                                                | A comparative study of cognition and brain anatomy between two neurodevelopmental disorders: 22q11.2 deletion syndrome and Williams syndrome | 2009 | Neuropsychologia                   | 47 | 1034 | 1044 | T&A | Excluded | wrong outcome      |
| <b>McCarthy C.S., Ramprasad A., Thompson C., Botti J.-A., Coman I.L., Kates W.R.</b>                                                                                                                        | A comparison of FreeSurfer-generated data with and without manual intervention                                                               | 2015 | Frontiers in Neuroscience          | 9  |      |      | T&A | Excluded | wrong topic        |
| <b>Haltrich I., Pikó H., Kiss E., Tóth Z., Karcagi V., Fekete G.</b>                                                                                                                                        | A de novo atypical ring sSMC(22) characterized by array CGH in a boy with cat-eye syndrome                                                   | 2014 | Molecular Cytogenetics             | 7  |      |      | T&A | Excluded | wrong topic        |
| <b>Fernández L., Nevado J., Santos F., Heine-Suñer D., Martínez-Glez V., García-Miñaur S., Palomo R., Delicado A., Pajares I.L., Palomares M., García-Guereta L., Valverde E., Hawkins F., Lapunzina P.</b> | A deletion and a duplication in distal 22q11.2 deletion syndrome region. Clinical implications and review                                    | 2009 | BMC Medical Genetics               | 10 |      |      | T&A | Excluded | wrong study design |

|                                                                                                                                                                                                |                                                                                                                                                            |      |                                             |     |      |      |     |          |                    |
|------------------------------------------------------------------------------------------------------------------------------------------------------------------------------------------------|------------------------------------------------------------------------------------------------------------------------------------------------------------|------|---------------------------------------------|-----|------|------|-----|----------|--------------------|
| <b>Voigt J., Papalopulu N.</b>                                                                                                                                                                 | A dominant-negative form of the E3 ubiquitin ligase Cullin-1 disrupts the correct allocation of cell fate in the neural crest lineage                      | 2006 | Development                                 | 133 | 559  | 568  | T&A | Excluded | no human           |
| <b>Poirsier C, et al.</b>                                                                                                                                                                      | A French multicenter study of over 700 patients with 22q11 deletions diagnosed using FISH or aCGH.                                                         | 2016 | Eur J Hum Genet                             |     | 844  | 851  | FT  | Excluded | incomplete outcome |
| <b>Ellegood J., Markx S., Lerch J.P., Steadman P.E., Genç C., Provenzano F., Kushner S.A., Henkelman R.M., Karavioraou M., Gogos J.A.</b>                                                      | A highly specific pattern of volumetric brain changes due to 22q11.2 deletions in both mice and humans                                                     | 2014 | Molecular Psychiatry                        | 19  |      |      | T&A | Excluded | wrong outcome      |
| <b>Kerstjens-Frederikse W.S., Hofstra R.M.W., Van Essen A.J., Meijers J.H.C., Buys C.H.C.M.</b>                                                                                                | A Hirschsprung disease locus at 22q11?                                                                                                                     | 1999 | Journal of Medical Genetics                 | 36  | 221  | 224  | T&A | Excluded | wrong topic        |
| <b>Gur R.E., Bassett A.S., McDonald-McGinn D.M., Bearden C.E., Chow E., Emanuel B.S., Owen M., Swillen A., Van Den Bree M., Vermeesch J., Vorstman J.A.S., Warren S., Lehner T., Morrow B.</b> | A neurogenetic model for the study of schizophrenia spectrum disorders: The International 22q11.2 Deletion Syndrome Brain Behavior Consortium              | 2017 | Molecular Psychiatry                        | 22  | 1664 | 1672 | FT  | Excluded | incomplete outcome |
| <b>Simon T.J.</b>                                                                                                                                                                              | A new account of the neurocognitive foundations of impairments in space, time, and number processing in children with chromosome 22q11.2 deletion syndrome | 2008 | Developmental Disabilities Research Reviews | 14  | 52   | 58   | T&A | Excluded | wrong study design |
| <b>Rauch A., Hofbeck M., Leipold G., Singer H., Pfeiffer R.A.</b>                                                                                                                              | A new type of 22q11.2 microdeletion associated with DiGeorge syndrome                                                                                      | 1999 | Genetic Counseling                          | 10  | 106  | 107  | T&A | Excluded | wrong topic        |
| <b>Ogilvie C.M., Ahn J.W., Mann K., Roberts R.G., Flinter F.</b>                                                                                                                               | A novel deletion in proximal 22q associated with cardiac septal defects and microcephaly: A case report                                                    | 2009 | Molecular Cytogenetics                      | 2   |      |      | T&A | Excluded | wrong study design |
| <b>Funke B.H., Brown A.C., Ramoni M.F., Regan M.E., Baglieri C., Finn C.T., Babcock M., Shprintzen R.J., Morrow B.E., Kucherlapati R.</b>                                                      | A novel, single nucleotide polymorphism-based assay to detect 22q11 deletions                                                                              | 2007 | Genetic Testing                             | 11  | 91   | 100  | FT  | Excluded | incomplete outcome |

|                                                                                                                                                                                                                |                                                                                                                                                                          |      |                                              |     |      |      |     |          |                    |
|----------------------------------------------------------------------------------------------------------------------------------------------------------------------------------------------------------------|--------------------------------------------------------------------------------------------------------------------------------------------------------------------------|------|----------------------------------------------|-----|------|------|-----|----------|--------------------|
| <b>Mikhail F.M., Descartes M., Piotrowski A., Andersson R., de Ståhl T.D., Komorowski J., Bruder C.E., Dumanski J.P., Carroll A.J.</b>                                                                         | A previously unrecognized microdeletion syndrome on chromosome 22 Band q11.2 encompassing the BCR Gene                                                                   | 2007 | American Journal of Medical Genetics, Part A | 143 | 2178 | 2184 | T&A | Excluded | wrong study design |
| <b>Schaer M., Bach Cuadra M., Tamarit L., Lazeyras F., Eliez S., Thiran J.-P.</b>                                                                                                                              | A Surface-based approach to quantify local cortical gyrification                                                                                                         | 2008 | IEEE Transactions on Medical Imaging         | 27  | 161  | 170  | T&A | Excluded | wrong topic        |
| <b>Earls L.R., Zakharenko S.S.</b>                                                                                                                                                                             | A synaptic function approach to investigating complex psychiatric diseases                                                                                               | 2014 | Neuroscientist                               | 20  | 257  | 271  | T&A | Excluded | wrong topic        |
| <b>Vaz S.O., Pires R., Pires L.M., Carreira I.M., Anjos R., Maciel P., Mota-Vieira L.</b>                                                                                                                      | A unique phenotype in a patient with a rare triplication of the 22q11.2 region and new clinical insights of the 22q11.2 microduplication syndrome: A report of two cases | 2015 | BMC Pediatrics                               | 15  |      |      | T&A | Excluded | wrong topic        |
| <b>Schmitt J.E., Vandekar S., Yi J., Calkins M.E., Ruparel K., Roalf D.R., Whinna D., Souders M.C., Satterwaite T.D., Prabhakaran K., Mcdonald-Mcginin D.M., Zackai E.H., Gur R.C., Emanuel B.S., Gur R.E.</b> | Aberrant Cortical Morphometry in the 22q11.2 Deletion Syndrome                                                                                                           | 2015 | Biological Psychiatry                        | 78  | 135  | 143  | T&A | Excluded | wrong outcome      |
| <b>Schaer M., Eric Schmitt J., Glaser B., Lazeyras F., Delavelle J., Eliez S.</b>                                                                                                                              | Abnormal patterns of cortical gyrification in velo-cardio-facial syndrome (deletion 22q11.2): An MRI study                                                               | 2006 | Psychiatry Research - Neuroimaging           | 146 | 1    | 11   | T&A | Excluded | wrong outcome      |
| <b>Shashi V., Muddasani S., Santos C.C., Berry M.N., Kwapil T.R., Lewandowski E., Keshavan M.S.</b>                                                                                                            | Abnormalities of the corpus callosum in nonpsychotic children with chromosome 22q11 deletion syndrome                                                                    | 2004 | NeuroImage                                   | 21  | 1399 | 1406 | T&A | Excluded | wrong outcome      |
| <b>Miyabara S., Ando M., Yoshida K., Saito N., Sugihara H.</b>                                                                                                                                                 | Absent aortic and pulmonary valves: Investigation of three fetal cases with cystic hygroma and review of the literature                                                  | 1994 | Heart and Vessels                            | 9   | 49   | 55   | T&A | Excluded | wrong topic        |

|                                                                                                                                                   |                                                                                                                                                                                              |      |                                                                   |     |      |      |     |          |                    |
|---------------------------------------------------------------------------------------------------------------------------------------------------|----------------------------------------------------------------------------------------------------------------------------------------------------------------------------------------------|------|-------------------------------------------------------------------|-----|------|------|-----|----------|--------------------|
| <b>Lamouroux A., Mousty E., Prodhomme O., Bigi N., Le Gac M.-P., Letouzey V., De Tayrac R., Mares P.</b>                                          | Absent or hypoplastic thymus: A marker for 22q11.2 microdeletion syndrome in case of polyhydramnios [La dysgénésie thymique:marqueur de microdélétion 22q11.2 dans le bilan d'un hydramnios] | 2016 | Journal de Gynecologie Obstetrique et Biologie de la Reproduction | 45  | 388  | 396  | T&A | Excluded | wrong outcome      |
| <b>Meskaldji D.E., Ottet M.-C., Cammoun L., Hagmann P., Meuli R., Eliez S., Thiran J.P., Morgenthaler S.</b>                                      | Adaptive strategy for the statistical analysis of connectomes                                                                                                                                | 2011 | PLoS ONE                                                          | 6   |      |      | T&A | Excluded | wrong topic        |
| <b>Nurden A.T., Nurden P.</b>                                                                                                                     | Advances in our understanding of the molecular basis of disorders of platelet function                                                                                                       | 2011 | Journal of Thrombosis and Haemostasis                             | 9   | 76   | 91   | T&A | Excluded | wrong topic        |
| <b>Jolin E.M., Weller R.A., Jessani N.R., Zackai E.H., McDonald-McGinn D.M., Weller E.B.</b>                                                      | Affective disorders and other psychiatric diagnoses in children and adolescents with 22q11.2 Deletion Syndrome                                                                               | 2009 | Journal of Affective Disorders                                    | 119 | 177  | 180  | T&A | Excluded | wrong outcome      |
| <b>Lima K., Følling I., Eiklid K.L., Natvig S., Abrahamsen T.G.</b>                                                                               | Age-dependent clinical problems in a Norwegian national survey of patients with the 22q11.2 deletion syndrome                                                                                | 2010 | European Journal of Pediatrics                                    | 169 | 983  | 989  | FT  | Excluded | incomplete outcome |
| <b>Dennis M., Spiegler B.J., Juranek J.J., Bigler E.D., Snead O.C., Fletcher J.M.</b>                                                             | Age, plasticity, and homeostasis in childhood brain disorders                                                                                                                                | 2013 | Neuroscience and Biobehavioral Reviews                            | 37  | 2760 | 2773 | T&A | Excluded | wrong topic        |
| <b>Bearden C.E., Van Erp T.G.M., Dutton R.A., Lee A.D., Simon T.J., Cannon T.D., Emanuel B.S., McDonald-McGinn D., Zackai E.H., Thompson P.M.</b> | Alterations in midline cortical thickness and gyrification patterns mapped in children with 22q11.2 deletions                                                                                | 2009 | Cerebral Cortex                                                   | 19  | 115  | 126  | T&A | Excluded | wrong outcome      |
| <b>Váša F., Griffa A., Scariati E., Schaer M., Urben S., Eliez S., Hagmann P.</b>                                                                 | An affected core drives network integration deficits of the structural connectome in 22q11.2 deletion syndrome                                                                               | 2016 | NeuroImage: Clinical                                              | 10  | 239  | 249  | T&A | Excluded | wrong outcome      |
| <b>Millan M.J.</b>                                                                                                                                | An epigenetic framework for neurodevelopmental disorders: From pathogenesis to potential therapy                                                                                             | 2013 | Neuropharmacology                                                 | 68  | 2    | 82   | T&A | Excluded | wrong topic        |

|                                                                                                                                                                                                                                    |                                                                                                                                                                  |      |                                                    |     |      |      |     |          |               |
|------------------------------------------------------------------------------------------------------------------------------------------------------------------------------------------------------------------------------------|------------------------------------------------------------------------------------------------------------------------------------------------------------------|------|----------------------------------------------------|-----|------|------|-----|----------|---------------|
| <b>Vergés L., Vidal F., Geán E., Alemany-Schmidt A., Oliver-Bonet M., Blanco J.</b>                                                                                                                                                | An exploratory study of predisposing genetic factors for DiGeorge/velocardiofacial syndrome                                                                      | 2017 | Scientific Reports                                 | 7   |      |      | T&A | Excluded | wrong outcome |
| <b>Shugar A.L., Shapiro J.M., Cytrynbaum C., Hedges S., Weksberg R., Fishman L.</b>                                                                                                                                                | An increased prevalence of thyroid disease in children with 22q11.2 deletion syndrome                                                                            | 2015 | American Journal of Medical Genetics, Part A       | 167 | 1560 | 1564 | T&A | Excluded | wrong outcome |
| <b>Zhang J., Ma D., Wang Y., Cao L., Wu Y., Qiao F., Liu A., Li L., Lin Y., Liu G., Liu C., Hu P., Xu Z.</b>                                                                                                                       | Analysis of chromosome 22q11 copy number variations by multiplex ligation-dependent probe amplification for prenatal diagnosis of congenital heart defect        | 2015 | Molecular Cytogenetics                             | 8   |      |      | T&A | Excluded | wrong outcome |
| <b>Toyoshima M., Akamatsu W., Okada Y., Ohnishi T., Balan S., Hisano Y., Iwayama Y., Toyota T., Matsumoto T., Itasaka N., Sugiyama S., Tanaka M., Yano M., Dean B., Okano H., Yoshikawa T.</b>                                     | Analysis of induced pluripotent stem cells carrying 22q11.2 deletion                                                                                             | 2016 | Translational Psychiatry                           | 6   |      |      | T&A | Excluded | no human      |
| <b>Crewther S.G., Kiely P.M., Kok L.-L., Crewther D.P.</b>                                                                                                                                                                         | Anomalies of genetic development as predictors of oculo-visual abnormalities in velo-cardio-facial syndrome                                                      | 1998 | Optometry and Vision Science                       | 75  | 748  | 757  | T&A | Excluded | wrong outcome |
| <b>Fruhman G., Van den Veyver I.B.</b>                                                                                                                                                                                             | Applications of Array Comparative Genomic Hybridization in Obstetrics                                                                                            | 2010 | Obstetrics and Gynecology Clinics of North America | 37  | 71   | 85   | T&A | Excluded | wrong topic   |
| <b>Bar-Shira A., Rosner G., Rosner S., Goldstein M., Orr-Urtreger A.</b>                                                                                                                                                           | Array-based comparative genome hybridization in clinical genetics                                                                                                | 2006 | Pediatric Research                                 | 60  | 353  | 358  | T&A | Excluded | wrong topic   |
| <b>Di Gregorio E., Gai G., Botta G., Calcia A., Pappi P., Talarico F., Savin E., Ribotta M., Zonta A., Mancini C., Giorgio E., Cavalieri S., Restagno G., Ferrero G.B., Viora E., Pasini B., Grosso E., Brusco A., Brussino A.</b> | Array-Comparative Genomic Hybridization Analysis in Fetuses with Major Congenital Malformations Reveals that 24% of Cases Have Pathogenic Deletions/Duplications | 2015 | Cytogenetic and Genome Research                    | 147 | 10   | 16   | T&A | Excluded | wrong topic   |

|                                                                                                                                                                                           |                                                                                                                                                         |      |                                                                         |     |     |     |     |          |                        |
|-------------------------------------------------------------------------------------------------------------------------------------------------------------------------------------------|---------------------------------------------------------------------------------------------------------------------------------------------------------|------|-------------------------------------------------------------------------|-----|-----|-----|-----|----------|------------------------|
| <b>Higashiyama R., Ohnuma T., Takebayashi Y., Hanzawa R., Shibata N., Yamamori H., Yasuda Y., Kushima I., Aleksic B., Kondo K., Ikeda M., Hashimoto R., Iwata N., Ozaki N., Arai H.</b>   | Association of copy number polymorphisms at the promoter and translated region of COMT with Japanese patients with schizophrenia                        | 2016 | American Journal of Medical Genetics, Part B: Neuropsychiatric Genetics | 171 | 447 | 457 | T&A | Excluded | wrong outcome          |
| <b>Chow E.W.C., Ho A., Wei C., Voormolen E.H.J., Crawley A.P., Bassett A.S.</b>                                                                                                           | Association of schizophrenia in 22q11.2 deletion syndrome and gray matter volumetric deficits in the superior temporal gyrus                            | 2011 | American Journal of Psychiatry                                          | 168 | 522 | 529 | T&A | Excluded | wrong outcome          |
| <b>Kessler-Icekson G., Birk E., Weintraub A.Y., Barhum Y., Kotlyar V., Schlesinger H., Rockah R., Vidne B.A., Frisch A.</b>                                                               | Association of tetralogy of fallot with a distinct region of del22q11.2                                                                                 | 2002 | American Journal of Medical Genetics                                    | 107 | 294 | 298 | FT  | Excluded | incomplete outcome     |
| <b>Gupta M., Bhatnagar P., Grover S., Kaur H., Baghel R., Bhasin Y., Chauhan C., Verma B., Manduva V., Mukherjee O., Purushottam M., Sharma A., Jain S., Brahmachari S.K., Kukreti R.</b> | Association studies of catechol-O-methyltransferase (COMT) gene with schizophrenia and response to antipsychotic treatment                              | 2009 | Pharmacogenomics                                                        | 10  | 385 | 397 | T&A | Excluded | wrong outcome          |
| <b>Thompson C.A., Karelis J., Middleton F.A., Gentile K., Coman I.L., Radoeva P.D., Mehta R., Fremont W.P., Antshel K.M., Faraone S.V., Kates W.R.</b>                                    | Associations between neurodevelopmental genes, neuroanatomy, and ultra high risk symptoms of psychosis in 22q11.2 deletion syndrome                     | 2017 | American Journal of Medical Genetics, Part B: Neuropsychiatric Genetics | 174 | 295 | 314 | T&A | Excluded | wrong outcome          |
| <b>Antshel K.M., Peebles J., AbdulSabur N., Higgins A.M., Roizen N., Shprintzen R., Fremont W.P., Nastasi R., Kates W.R.</b>                                                              | Associations between performance on the Rey-Osterrieth complex figure and regional brain volumes in children with and without velocardiofacial syndrome | 2008 | Developmental Neuropsychology                                           | 33  | 601 | 622 | T&A | Excluded | wrong outcome          |
| <b>Cornish K., Wilding J.</b>                                                                                                                                                             | Attention, Genes, and Developmental Disorders                                                                                                           | 2010 | Attention, Genes, and Developmental Disorders                           |     | 1   | 576 | T&A | Excluded | wrong publication type |
| <b>Nogueira S.I., Hacker A.M., Bellucco F.T.S., Christofolini D.M., Kulikowski L.D., Cernach M.C.S.P., Emanuel B.S., Melaraqno M.I.</b>                                                   | Atypical 22q11.2 deletion in a patient with DGS/VCFS spectrum                                                                                           | 2008 | European Journal of Medical Genetics                                    | 51  | 226 | 230 | T&A | Excluded | wrong topic            |

|                                                                                                                                        |                                                                                                                                                                              |      |                                                    |     |     |     |     |          |                    |
|----------------------------------------------------------------------------------------------------------------------------------------|------------------------------------------------------------------------------------------------------------------------------------------------------------------------------|------|----------------------------------------------------|-----|-----|-----|-----|----------|--------------------|
| <b>Molck M.C., Vieira T.P., Sgardoli I.C., Simioni M., dos Santos A.P., Souza J., Monteiro F.P., Gil-da-Silva-Lopes V.L.</b>           | Atypical copy number abnormalities in 22q11.2 region: Report of three cases                                                                                                  | 2013 | European Journal of Medical Genetics               | 56  | 515 | 520 | T&A | Excluded | wrong topic        |
| <b>Simon T.J., Wu Z., Avants B., Zhang H., Gee J.C., Stebbins G.T.</b>                                                                 | Atypical cortical connectivity and visuospatial cognitive impairments are related in children with chromosome 22q11.2 deletion syndrome                                      | 2008 | Behavioral and Brain Functions                     | 4   |     |     | T&A | Excluded | wrong outcome      |
| <b>Beaujard M.-P., Chantot S., Dubois M., Keren B., Carpentier W., Mabboux P., Whalen S., Vodovar M., Siffroi J.-P., Portnoï M.-F.</b> | Atypical deletion of 22q11.2: Detection using the FISH TBX1 probe and molecular characterization with high-density SNP arrays                                                | 2009 | European Journal of Medical Genetics               | 52  | 321 | 327 | T&A | Excluded | wrong topic        |
| <b>Amati F., Conti E., Novelli A., Bengala M., Digilio M.C., Marino B., Giannotti A., Gabrielli O., Novelli G., Dallapiccola B.</b>    | Atypical deletions suggest five 22q11.2 critical regions related to the DiGeorge/velo-cardio-facial syndrome                                                                 | 1999 | European Journal of Human Genetics                 | 7   | 903 | 909 | T&A | Excluded | wrong topic        |
| <b>Weiss L.A.</b>                                                                                                                      | Autism genetics: Emerging data from genome-wide copynumber and single nucleotide polymorphism scans                                                                          | 2009 | Expert Review of Molecular Diagnostics             | 9   | 795 | 803 | T&A | Excluded | wrong topic        |
| <b>Reynaud R., Derain-Court J., Braunstein D., Veyrat M., Gaudart J., Giuliano F., Philip N.</b>                                       | Auxological evaluation in patients with a 22q11.2 microdeletion syndrome: Normal prevalence of obesity and neonatal length and gender influence on body mass index evolution | 2011 | Hormone Research in Paediatrics                    | 76  | 172 | 177 | T&A | Excluded | wrong outcome      |
| <b>Antshel K.M., Conchelos J., Lanzetta G., Fremont W., Kates W.R.</b>                                                                 | Behavior and corpus callosum morphology relationships in velocardiofacial syndrome (22q11.2 deletion syndrome)                                                               | 2005 | Psychiatry Research - Neuroimaging                 | 138 | 235 | 245 | T&A | Excluded | wrong outcome      |
| <b>Tang K.L., Antshel K.M., Fremont W.P., Kates W.R.</b>                                                                               | Behavioral and psychiatric phenotypes in 22q11.2 deletion syndrome                                                                                                           | 2015 | Journal of Developmental and Behavioral Pediatrics | 36  | 639 | 650 | T&A | Excluded | wrong study design |
| <b>Bruining H., Eijkemans M.J., Kas M.J., Curran S.R., Vorstman J.A., Bolton P.F.</b>                                                  | Behavioral signatures related to genetic disorders in autism                                                                                                                 | 2014 | Molecular Autism                                   | 5   |     |     | T&A | Excluded | wrong topic        |



|                                                                                                                                                                       |                                                                                                                                                             |      |                                                                     |     |      |      |     |          |                    |
|-----------------------------------------------------------------------------------------------------------------------------------------------------------------------|-------------------------------------------------------------------------------------------------------------------------------------------------------------|------|---------------------------------------------------------------------|-----|------|------|-----|----------|--------------------|
| <b>Pierdominici M., Mazzetta F., Caprini E., Marziali M., Digilio M.C., Marino B., Aiuti A., Amati F., Russo G., Novelli G., Pandolfi F., Luzi G., Giovannetti A.</b> | Biased T-cell receptor repertoires in patients with chromosome 22q11.2 deletion syndrome (DiGeorge syndrome/velocardiofacial syndrome)                      | 2003 | Clinical and Experimental Immunology                                | 132 | 323  | 331  | T&A | Excluded | wrong outcome      |
| <b>Beliaev A.M., Mundy I.</b>                                                                                                                                         | Bilateral simultaneous testicular torsion presenting as a diagnostic dilemma                                                                                | 2013 | BMJ Case Reports                                                    |     |      |      | T&A | Excluded | wrong topic        |
| <b>Winger E.E., Reed J.L., Ashoush S., El-Toukhy T., Ahuja S., Taranissi M.</b>                                                                                       | Birth defect rates in women using Adalimumab (Humira®) to treat immunologic-based infertility in IVF patients.                                              | 2011 | American journal of reproductive immunology (New York, N.Y. : 1989) | 66  | 237  | 241  | T&A | Excluded | wrong topic        |
| <b>Van Amelsvoort T., Daly E., Henry J., Robertson D., Ng V., Owen M., Murphy K.C., Murphy D.G.M.</b>                                                                 | Brain anatomy in adults with velocardiofacial syndrome with and without schizophrenia: Preliminary results of a structural magnetic resonance imaging study | 2004 | Archives of General Psychiatry                                      | 61  | 1085 | 1096 | T&A | Excluded | wrong outcome      |
| <b>Eisenberg D.P., Jabbi M., Berman K.F.</b>                                                                                                                          | Bridging the gene-behavior divide through neuroimaging deletion syndromes: Velocardiofacial (22q11.2 Deletion) and Williams (7q11.23 Deletion) syndromes    | 2010 | NeuroImage                                                          | 53  | 857  | 869  | T&A | Excluded | wrong outcome      |
| <b>Couser N.L., Pande C.K., Walsh J.M., Tepperberg J., Aylsworth A.S.</b>                                                                                             | Camptodactyly and the 22q11.2 deletion syndrome                                                                                                             | 2017 | American Journal of Medical Genetics, Part A                        | 173 | 515  | 518  | T&A | Excluded | wrong study design |
| <b>Freyer L., Morrow B.E.</b>                                                                                                                                         | Canonical Wnt signaling modulates Tbx1, Eya1, and Six1 expression, restricting neurogenesis in the otic vesicle                                             | 2010 | Developmental Dynamics                                              | 239 | 1708 | 1722 | T&A | Excluded | no human           |
| <b>Jalbrzikowski M., Hamzah Ahmed K., Patel A., Jonas R., Kushan L., Chow C., Bearden C.E.</b>                                                                        | Categorical Versus Dimensional Approaches to Autism-Associated Intermediate Phenotypes in 22q11.2 Microdeletion Syndrome                                    | 2017 | Biological Psychiatry: Cognitive Neuroscience and Neuroimaging      | 2   | 53   | 65   | T&A | Excluded | wrong outcome      |

|                                                                                                                                         |                                                                                                                              |      |                                                                             |     |     |     |     |          |                        |
|-----------------------------------------------------------------------------------------------------------------------------------------|------------------------------------------------------------------------------------------------------------------------------|------|-----------------------------------------------------------------------------|-----|-----|-----|-----|----------|------------------------|
| <b>Oppenheimer A.G., Fulmer S., Shifteh K., Chang J.-K., Brook A., Shanske A.L., Shprintzen R.J.</b>                                    | Cervical vascular and upper airway asymmetry in velo-cardio-facial syndrome: Correlation of nasopharyngoscopy with MRA       | 2010 | International Journal of Pediatric Otorhinolaryngology                      | 74  | 619 | 625 | T&A | Excluded | wrong outcome          |
| <b>Wu D., Chen Y., Xu C., Wang K., Wang H., Zheng F., Ma D., Wang G.</b>                                                                | Characteristic Face: A Key Indicator for Direct Diagnosis of 22q11.2 Deletions in Chinese Velocardiofacial Syndrome Patients | 2013 | PLoS ONE                                                                    | 8   |     |     | FT  | Included |                        |
| <b>Volpe P., Paladini D., Marasini M., Buonadonna A.L., Russo M.G., Caruso G., Marzullo A., Arciprete P., Martinelli P., Gentile M.</b> | Characteristics, associations and outcome of absent pulmonary valve syndrome in the fetus                                    | 2004 | Ultrasound in Obstetrics and Gynecology                                     | 24  | 623 | 628 | T&A | Excluded | wrong topic            |
| <b>Landis B.J., Cooper D.S., Hinton R.B.</b>                                                                                            | CHD associated with syndromic diagnoses: Peri-operative risk factors and early outcomes                                      | 2014 | Cardiology in the Young                                                     | 26  | 30  | 52  | T&A | Excluded | wrong topic            |
| <b>Magoulas P.L., El-Hattab A.W.</b>                                                                                                    | Chromosome 15q24 microdeletion syndrome                                                                                      | 2012 | Orphanet Journal of Rare Diseases                                           | 7   |     |     | T&A | Excluded | wrong topic            |
| <b>Jarzembowski J.A.</b>                                                                                                                | Chromosome 22q Abnormalities                                                                                                 | 2014 | Pathobiology of Human Disease: A Dynamic Encyclopedia of Disease Mechanisms |     | 184 | 184 | T&A | Excluded | wrong publication type |
| <b>Eliez S., Blasey C.M.</b>                                                                                                            | Chromosome 22q11 deletion and brain structure [5]                                                                            | 2001 | British Journal of Psychiatry                                               | 179 | 270 |     | T&A | Excluded | wrong publication type |
| <b>Halder A., Jain M., Chaudhary I., Varma B.</b>                                                                                       | Chromosome 22q11.2 microdeletion in monozygotic twins with discordant phenotype and deletion size                            | 2012 | Molecular Cytogenetics                                                      | 5   |     |     | T&A | Excluded | wrong study design     |
| <b>Molesky M.G.</b>                                                                                                                     | Chromosome 22q11.2 microdeletion syndrome                                                                                    | 2011 | Neonatal Network                                                            | 30  | 304 | 311 | T&A | Excluded | wrong study design     |

|                                                                                                   |                                                                                                                                        |      |                                                 |     |      |      |     |          |                        |
|---------------------------------------------------------------------------------------------------|----------------------------------------------------------------------------------------------------------------------------------------|------|-------------------------------------------------|-----|------|------|-----|----------|------------------------|
| <b>Morrow B.E.</b>                                                                                | Chromosome 22q11.2 rearrangement disorders                                                                                             | 2006 | Genomic Disorders: The Genomic Basis of Disease |     | 193  | 206  | T&A | Excluded | wrong publication type |
| <b>Dufour F., Schaer M., Debbané M., Farhoumand R., Glaser B., Eliez S.</b>                       | Cingulate gyral reductions are related to low executive functioning and psychotic symptoms in 22q11.2 deletion syndrome                | 2008 | Neuropsychologia                                | 46  | 2986 | 2992 | T&A | Excluded | wrong outcome          |
| <b>Huang L., Xie Y., Zhou Y., Luo Y., Huang X., Xu Z., Cai D., Fang Q.</b>                        | Clinical and molecular cytogenetic studies of an unrecognised 22q11.2 deletion in three families                                       | 2015 | Experimental and Therapeutic Medicine           | 9   | 823  | 828  | T&A | Excluded | wrong study design     |
| <b>Christopoulou G., Sismani C., Sakellariou M., Saklamaki M., Athanassiou V., Velissariou V.</b> | Clinical and molecular description of the prenatal diagnosis of a fetus with a maternally inherited microduplication 22q11.2 of 2.5Mb  | 2013 | Gene                                            | 527 | 694  | 697  | T&A | Excluded | wrong topic            |
| <b>Costain G., Bassett A.S.</b>                                                                   | Clinical applications of schizophrenia genetics: Genetic diagnosis, risk, and counseling in the molecular era                          | 2012 | Application of Clinical Genetics                | 5   | 1    | 18   | T&A | Excluded | wrong study design     |
| <b>Azancot A., Eydoux P., Vuillard E., Cusin V., Baumann C., Blot P.</b>                          | Clinical spectrum of antenatal tetralogy of fallot [Spectre clinique de la tetralogie de fallot antenatale]                            | 2000 | Archives des Maladies du Coeur et des Vaisseaux | 93  | 587  | 593  | T&A | Excluded | wrong topic            |
| <b>Roberts C., Daw S.C.M., Halford S., Scambler P.J.</b>                                          | Cloning and developmental expression analysis of chick Hira (Chira), a candidate gene for DiGeorge syndrome                            | 1997 | Human Molecular Genetics                        | 6   | 237  | 245  | T&A | Excluded | no human               |
| <b>Li D., Tekin M., Buch M., Fan Y.-S.</b>                                                        | Co-existence of other copy number variations with 22q11.2 deletion or duplication: A modifier for variable phenotypes of the syndrome? | 2012 | Molecular Cytogenetics                          | 5   |      |      | T&A | Excluded | wrong study design     |

|                                                                                                                                                                             |                                                                                                                                                                                                                   |      |                                                                     |       |      |      |     |          |                    |
|-----------------------------------------------------------------------------------------------------------------------------------------------------------------------------|-------------------------------------------------------------------------------------------------------------------------------------------------------------------------------------------------------------------|------|---------------------------------------------------------------------|-------|------|------|-----|----------|--------------------|
| <b>Meechan D.W., Rutz H.L.H., Fralish M.S., Maynard T.M., Rothblat L.A., Lamantia A.-S.</b>                                                                                 | Cognitive ability is associated with altered medial frontal cortical circuits in the LgDel mouse model of 22q11.2DS                                                                                               | 2015 | Cerebral Cortex                                                     | 25    | 1143 | 1151 | T&A | Excluded | no human           |
| <b>Demily C., Franck N.</b>                                                                                                                                                 | Cognitive behavioral therapy in 22q11.2 microdeletion with psychotic symptoms: What do we learn from schizophrenia?                                                                                               | 2016 | European Journal of Medical Genetics                                | 59    | 596  | 603  | T&A | Excluded | wrong study design |
| <b>De Smedt B., Swillen A., Devriendt K., Fryns J.-P., Verschaffel L., Boets B., Ghesquière P.</b>                                                                          | Cognitive correlates of mathematical disabilities in children with velo-cardio-facial syndrome                                                                                                                    | 2008 | Genetic Counseling                                                  | 19    | 71   | 94   | T&A | Excluded | wrong outcome      |
| <b>Keefe R.S.E., Kahn R.S.</b>                                                                                                                                              | Cognitive decline and disrupted cognitive trajectory in schizophrenia                                                                                                                                             | 2017 | JAMA Psychiatry                                                     | 74    | 535  | 536  | T&A | Excluded | wrong topic        |
| <b>Biswas A.B., Furniss F.</b>                                                                                                                                              | Cognitive phenotype and psychiatric disorder in 22q11.2 deletion syndrome: A review                                                                                                                               | 2016 | Research in Developmental Disabilities                              | 53-54 | 242  | 257  | T&A | Excluded | wrong study design |
| <b>Mariano M.A., Tang K., Kurtz M., Kates W.R.</b>                                                                                                                          | Cognitive remediation for adolescents with 22q11 deletion syndrome (22q11DS): A preliminary study examining effectiveness, feasibility, and fidelity of a hybrid strategy, remote and computer-based intervention | 2015 | Schizophrenia Research                                              | 166   | 283  | 289  | T&A | Excluded | wrong outcome      |
| <b>Rigard C., Peyroux E., Morel A., Demily C.</b>                                                                                                                           | Cognitive remediation in child psychiatry [Remédiation cognitive en psychiatrie de l'enfant]                                                                                                                      | 2016 | ANAE - Approche Neuropsychologique des Apprentissages chez l'Enfant | 28    | 233  | 240  | T&A | Excluded | wrong topic        |
| <b>Manolakos E., Sarri C., Vetro A., Kefalas K., Leze E., Sofocleus C., Kitsos G., Merou K., Kokotas H., Papadopoulou A., Attilakos A., Petersen M.B., Kitsiou-Tzeli S.</b> | Combined 22q11.1-q11.21 deletion with 15q11.2-q13.3 duplication identified by array-CGH in a 6 years old boy                                                                                                      | 2011 | Molecular Cytogenetics                                              | 4     |      |      | T&A | Excluded | wrong study design |

|                                                                                                                                                                                  |                                                                                                                                                                                     |      |                                      |     |      |      |     |          |                    |
|----------------------------------------------------------------------------------------------------------------------------------------------------------------------------------|-------------------------------------------------------------------------------------------------------------------------------------------------------------------------------------|------|--------------------------------------|-----|------|------|-----|----------|--------------------|
| <b>Fernández L., Lapunzina P., Arjona D., López Pajares I., García-Guereta L., Elorza D., Burgueros M., De Torres M.L., Mori M.A., Palomares M., García-Alix A., Delicado A.</b> | Comparative study of three diagnostic approaches (FISH, STRs and MLPA) in 30 patients with 22q11.2 deletion syndrome                                                                | 2005 | Clinical Genetics                    | 68  | 373  | 378  | FT  | Excluded | incomplete outcome |
| <b>Schneider M., Debbané M., Lagioia A., Salomon R., D'Argembeau A., Eliez S.</b>                                                                                                | Comparing the neural bases of self-referential processing in typically developing and 22q11.2 adolescents                                                                           | 2012 | Developmental Cognitive Neuroscience | 2   | 277  | 289  | T&A | Excluded | wrong outcome      |
| <b>Hunsaker M.R.</b>                                                                                                                                                             | Comprehensive neurocognitive endophenotyping strategies for mouse models of genetic disorders                                                                                       | 2012 | Progress in Neurobiology             | 96  | 220  | 241  | T&A | Excluded | no human           |
| <b>Chen Y.-F., Kou P.-L., Tsai S.-J., Chen K.-F., Chan H.-H., Chen C.-M., Sun H.S.</b>                                                                                           | Computational analysis and refinement of sequence structure on chromosome 22q11.2 region: Application to the development of quantitative real-time PCR assay for clinical diagnosis | 2006 | Genomics                             | 87  | 290  | 297  | T&A | Excluded | wrong outcome      |
| <b>Gothelf D., Eliez S., Thompson T., Hinard C., Penniman L., Feinstein C., Kwon H., Jin S., Jo B., Antonarakis S.E., Morris M.A., Reiss A.L.</b>                                | COMT genotype predicts longitudinal cognitive decline and psychosis in 22q11.2 deletion syndrome                                                                                    | 2005 | Nature Neuroscience                  | 8   | 1500 | 1502 | T&A | Excluded | wrong outcome      |
| <b>Blennow E., Lagerstedt K., Malmgren S., Sahlén S., Schoumans J., Anderlid B.M.</b>                                                                                            | Concurrent microdeletion and duplication of 22q11.2                                                                                                                                 | 2008 | Clinical Genetics                    | 74  | 61   | 67   | T&A | Excluded | wrong topic        |
| <b>Hakim Z.S., DiMichele L.A., Doherty J.T., Homeister J.W., Beggs H.E., Reichardt L.F., Schwartz R.J., Brackhan J., Smithies O., Mack C.P., Taylor J.M.</b>                     | Conditional deletion of focal adhesion kinase leads to defects in ventricular septation and outflow tract alignment                                                                 | 2007 | Molecular and Cellular Biology       | 27  | 5352 | 5364 | T&A | Excluded | no human           |
| <b>Goodman F.R.</b>                                                                                                                                                              | Congenital abnormalities of body patterning: Embryology revisited                                                                                                                   | 2003 | Lancet                               | 362 | 651  | 662  | T&A | Excluded | wrong topic        |

|                                                                                                            |                                                                                                                                |      |                                                                                |       |     |     |     |          |                    |
|------------------------------------------------------------------------------------------------------------|--------------------------------------------------------------------------------------------------------------------------------|------|--------------------------------------------------------------------------------|-------|-----|-----|-----|----------|--------------------|
| <b>Marino B., Mileto F., Digilio M.C., Carotti A., Di Donato R.</b>                                        | Congenital cardiovascular disease and velo-cardio-facial syndrome                                                              | 2005 | Velo-Cardio-Facial Syndrome: A Model for Understanding Microdeletion Disorders |       | 47  | 82  | T&A | Excluded | wrong study design |
| <b>Matthiesen N.B., Agergaard P., Henriksen T.B., Bach C.C., Gaynor J.W., Hjortdal V., Østergaard J.R.</b> | Congenital Heart Defects and Measures of Fetal Growth in Newborns with Down Syndrome or 22q11.2 Deletion Syndrome              | 2016 | Journal of Pediatrics                                                          | 175   | 116 | 122 | T&A | Excluded | wrong outcome      |
| <b>Schaer M., Glaser B., Cuadra M.B., Debbane M., Thiran J.-P., Eliez S.</b>                               | Congenital heart disease affects local gyrification in 22q11.2 deletion syndrome                                               | 2009 | Developmental Medicine and Child Neurology                                     | 51    | 746 | 753 | T&A | Excluded | wrong outcome      |
| <b>Fountain D.M., Schaer M., Mutlu A.K., Schneider M., Debbané M., Eliez S.</b>                            | Congenital heart disease is associated with reduced cortical and hippocampal volume in patients with 22q11.2 deletion syndrome | 2014 | Cortex                                                                         | 57    | 128 | 142 | T&A | Excluded | wrong outcome      |
| <b>Kunishima S., Saito H.</b>                                                                              | Congenital macrothrombocytopenias                                                                                              | 2006 | Blood Reviews                                                                  | 20    | 111 | 121 | T&A | Excluded | wrong topic        |
| <b>Jobe S.M.</b>                                                                                           | Congenital Thrombocytopenia                                                                                                    | 2009 | Transfusion Medicine and Hemostasis                                            |       | 445 | 451 | T&A | Excluded | wrong topic        |
| <b>Karunamuni G.H., Ma P., Gu S., Rollins A.M., Jenkins M.W., Watanabe M.</b>                              | Connecting teratogen-induced congenital heart defects to neural crest cells and their effect on cardiac function               | 2014 | Birth Defects Research Part C - Embryo Today: Reviews                          | 102   | 227 | 250 | T&A | Excluded | wrong topic        |
| <b>Machado A.M.C., Teixeira C.A.C.</b>                                                                     | Content-based retrieval of medical images with elongated structures                                                            | 2008 | Communications in Computer and Information Science                             | 25 CC | 189 | 201 | T&A | Excluded | wrong topic        |
| <b>Schreiner M.J., Lazaro M.T., Jalbrzikowski M., Bearden C.E.</b>                                         | Converging levels of analysis on a genomic hotspot for psychosis: Insights from 22q11.2 Deletion Syndrome                      | 2013 | Neuropharmacology                                                              | 68    | 157 | 173 | T&A | Excluded | wrong study design |
| <b>D'Angelo C.S., Koiffmann C.P.</b>                                                                       | Copy number variants in obesity-related syndromes: Review and perspectives on novel molecular approaches                       | 2012 | Journal of Obesity                                                             |       |     |     | T&A | Excluded | wrong topic        |

|                                                                                                                                                                                                                                                                                                                                              |                                                                                                                                               |      |                                      |     |     |     |     |          |                    |
|----------------------------------------------------------------------------------------------------------------------------------------------------------------------------------------------------------------------------------------------------------------------------------------------------------------------------------------------|-----------------------------------------------------------------------------------------------------------------------------------------------|------|--------------------------------------|-----|-----|-----|-----|----------|--------------------|
| <b>Levinson D.F., Duan J., Oh S., Wang K., Sanders A.R., Shi J., Zhang N., Mowry B.J., Olincy A., Amin F., Cloninger C.R., Silverman J.M., Buccola N.G., Byerley W.F., Black D.W., Kendler K.S., Freedman R., Dudbridge F., Pe'er I., Hakonarson H., Bergen S.E., Fanous A.H., Holmans P.A., Geiman P.V.</b>                                 | Copy number variants in schizophrenia: Confirmation of five previous findings and new evidence for 3q29 microdeletions and VIPR2 duplications | 2011 | American Journal of Psychiatry       | 168 | 302 | 316 | T&A | Excluded | wrong topic        |
| <b>Wit J.M., Van Duyvenvoorde H.A., Van Klinken J.B., Caliebe J., Bosch C.A.J., Lui J.C., Gijsbers A.C.J., Bakker E., Breuning M.H., Oostdijk W., Losekoot M., Baron J., Binder G., Ranke M.B., Ruijvenkamp C.A.L.</b>                                                                                                                       | Copy number variants in short children born small for gestational age                                                                         | 2014 | Hormone Research in Paediatrics      | 82  | 310 | 318 | T&A | Excluded | wrong topic        |
| <b>Breckpot J., Vercauysse M., Weyts E., Vandevoort S., D'Haenens G., Van Buggenhout G., Leempoels L., Brischoux Boucher E., Van Maldergem L., Renieri A., Mencarelli M.A., D'Angelo C., Mericq V., Hoffer M.J., Tauber M., Molinas C., Castiglioni C., Brison N., Vermeesch J.R., Danckaerts M., Sienaert P., Devriendt K., Vercloot A.</b> | Copy number variation analysis in adults with catatonia confirms haploinsufficiency of SHANK3 as a predisposing factor                        | 2016 | European Journal of Medical Genetics | 59  | 436 | 443 | T&A | Excluded | wrong topic        |
| <b>Szatkiewicz J.P., O'Dushlaine C., Chen G., Chambert K., Moran J.L., Neale B.M., Fromer M., Ruderfer D., Akterin S., Bergen S.E., Kähler A., Magnusson P.K.E., Kim Y., Crowley J.J., Rees E., Kirov G., O'Donovan M.C., Owen M.J., Walters J., Scolnick E., Sklar P., Purcell S., Hultman C.M., McCarroll S.A., Sullivan P.F.</b>          | Copy number variation in schizophrenia in Sweden                                                                                              | 2014 | Molecular Psychiatry                 | 19  | 762 | 773 | FT  | Excluded | incomplete outcome |
| <b>Grayton H.M., Fernandes C., Rujescu D., Collier D.A.</b>                                                                                                                                                                                                                                                                                  | Copy number variations in neurodevelopmental disorders                                                                                        | 2012 | Progress in Neurobiology             | 99  | 81  | 91  | T&A | Excluded | wrong topic        |

|                                                                                                                                                                                                                                                                                                                                                                                                                                      |                                                                                                                            |      |                                              |      |      |      |     |          |                    |
|--------------------------------------------------------------------------------------------------------------------------------------------------------------------------------------------------------------------------------------------------------------------------------------------------------------------------------------------------------------------------------------------------------------------------------------|----------------------------------------------------------------------------------------------------------------------------|------|----------------------------------------------|------|------|------|-----|----------|--------------------|
| <b>Mlynarski E.E., Sheridan M.B., Xie M., Guo T., Racedo S.E., McDonald-McGinn D.M., Gai X., Chow E.W.C., Vorstman J., Swillen A., Devriendt K., Breckpot J., Digilio M.C., Marino B., Dallapiccola B., Philip N., Simon T.J., Roberts A.E., Piotrowicz M., Bearden C.E., Eliez S., Gothelf D., Coleman K., Kates W.R., Devoto M., Zackai E., Heine-Suñer D., Shaikh T.H., Bassett A.S., Goldmuntz E., Morrow R.F., Emanuel R.S.</b> | Copy-number variation of the glucose transporter gene SLC2A3 and congenital heart defects in the 22q11.2 deletion syndrome | 2015 | American Journal of Human Genetics           | 96   | 753  | 764  | FT  | Included |                    |
| <b>Machado A.M.C., Simon T.J., Nguyen V., McDonald-McGinn D.M., Zackai E.H., Gee J.C.</b>                                                                                                                                                                                                                                                                                                                                            | Corpus callosum morphology and ventricular size in chromosome 22q11.2 deletion syndrome                                    | 2007 | Brain Research                               | 1131 | 197  | 210  | T&A | Excluded | wrong outcome      |
| <b>Matsuoka R., Shimizu N., Kimura M., Minoshima S., Mamura S.-I., Takao A., Momma K.</b>                                                                                                                                                                                                                                                                                                                                            | Correlation between smaller deletion size and mental retardation in de122q11.2 syndrome                                    | 1997 | Japanese Journal of Human Genetics           | 42   | 122  |      | T&A | Excluded | not available      |
| <b>Flore G., Cioffi S., Bilio M., Illingworth E.</b>                                                                                                                                                                                                                                                                                                                                                                                 | Cortical Development Requires Mesodermal Expression of Tbx1, a Gene Haploinsufficient in 22q11.2 Deletion Syndrome         | 2017 | Cerebral cortex (New York, N.Y. : 1991)      | 27   | 2210 | 2225 | T&A | Excluded | no human           |
| <b>Kunwar A., Ramanathan S., Nelson J., Antshel K.M., Fremont W., Higgins A.M., Shprintzen R.J., Kates W.R.</b>                                                                                                                                                                                                                                                                                                                      | Cortical gyrification in velo-cardio-facial (22q11.2 deletion) syndrome: A longitudinal study                              | 2012 | Schizophrenia Research                       | 137  | 20   | 25   | T&A | Excluded | wrong outcome      |
| <b>Berhanu D., Mattiaccio L.M., Antshel K.M., Fremont W., Middleton F.A., Kates W.R.</b>                                                                                                                                                                                                                                                                                                                                             | Cortical-amygdala volumetric ratios predict onset of symptoms of psychosis in 22q11.2 deletion syndrome                    | 2017 | Psychiatry Research - Neuroimaging           | 259  | 10   | 15   | T&A | Excluded | wrong outcome      |
| <b>Cordero D.R., Brugmann S., Chu Y., Bajpai R., Jame M., Helms J.A.</b>                                                                                                                                                                                                                                                                                                                                                             | Cranial neural crest cells on the move: Their roles in craniofacial development                                            | 2011 | American Journal of Medical Genetics, Part A | 155  | 270  | 279  | T&A | Excluded | wrong study design |



|                                                                                                                                                                                                                                                   |                                                                                                                                                                                                                                           |      |                                 |     |      |      |     |          |                        |
|---------------------------------------------------------------------------------------------------------------------------------------------------------------------------------------------------------------------------------------------------|-------------------------------------------------------------------------------------------------------------------------------------------------------------------------------------------------------------------------------------------|------|---------------------------------|-----|------|------|-----|----------|------------------------|
| <b>Clements C.C., Wenger T.L., Zoltowski A.R., Bertollo J.R., Miller J.S., De Marchena A.B., Mitteer L.M., Carey J.C., Yerys B.E., Zackai E.H., Emanuel B.S., McDonald-McGinn D.M., Schultz R.T.</b>                                              | Critical region within 22q11.2 linked to higher rate of autism spectrum disorder                                                                                                                                                          | 2017 | Molecular Autism                | 8   |      |      | FT  | Excluded | incomplete outcome     |
| <b>Yaron Y., Jani J., Schmid M., Oepkes D.</b>                                                                                                                                                                                                    | Current status of testing for microdeletion syndromes and rare autosomal trisomies using cell-free DNA technology                                                                                                                         | 2015 | Obstetrics and Gynecology       | 126 | 1095 | 1099 | T&A | Excluded | wrong topic            |
| <b>García G.A.G., Vargas C.M.T., Samudio C.G.G., Peña C.M.M., Arango J.C.O., Restrepo J.L.F.</b>                                                                                                                                                  | Cytogenetic evaluation and loss of heterozigosity of chromosome 22q11.2 in patients with the DiGeorge syndrome [Evaluación citogenética y de pérdida de la heterocigosidad de la región 22q11.2 en pacientes con el síndrome de DiGeorge] | 2011 | Iatreia                         | 24  | 229  | 237  | T&A | Excluded | wrong study design     |
| <b>Feenstra I., Brunner H.G., Van Ravenswaaij C.M.A.</b>                                                                                                                                                                                          | Cytogenetic genotype-phenotype studies: Improving genotyping, phenotyping and data storage                                                                                                                                                | 2006 | Cytogenetic and Genome Research | 115 | 231  | 239  | T&A | Excluded | wrong topic            |
| <b>Sellier C., Hwang V.J., Dandekar R., Durbin-Johnson B., Charlet-Berguerand N., Ander B.P., Sharp F.R., Angkustsiri K., Simon T.J., Tassone F.</b>                                                                                              | Decreased DGCR8 expression and miRNA dysregulation in individuals with 22q11.2 deletion syndrome                                                                                                                                          | 2014 | PLoS ONE                        | 9   |      |      | T&A | Excluded | wrong outcome          |
| <b>Markert M.L.</b>                                                                                                                                                                                                                               | Defects in Thymic Development: DiGeorge/CHARGE/Chromosome 22q11.2 Deletion                                                                                                                                                                | 2014 | Stiehm's Immune Deficiencies    |     | 221  | 242  | T&A | Excluded | wrong publication type |
| <b>Monteiro F.P., Vieira T.P., Sgardioli I.C., Molck M.C., Damiano A.P., Souza J., Monlleó I.L., Fontes M.I.B., Fett-Conte A.C., Félix T.M., Leal G.F., M.ribeiro E., Banzato C.E.M., Dantas C.D.R., Lopes-Cendes I., Gil-Da-Silva-Lopes V.L.</b> | Defining new guidelines for screening the 22q11.2 deletion based on a clinical and dysmorphic evaluation of 194 individuals and review of the literature                                                                                  | 2013 | European Journal of Pediatrics  | 172 | 927  | 945  | FT  | Included |                        |

|                                                                                                                                      |                                                                                                                                                               |      |                                                                            |       |     |     |     |          |                    |
|--------------------------------------------------------------------------------------------------------------------------------------|---------------------------------------------------------------------------------------------------------------------------------------------------------------|------|----------------------------------------------------------------------------|-------|-----|-----|-----|----------|--------------------|
| <b>Hay B.N.</b>                                                                                                                      | Deletion 22q11: Spectrum of Associated Disorders                                                                                                              | 2007 | Seminars in Pediatric Neurology                                            | 14    | 136 | 139 | T&A | Excluded | wrong study design |
| <b>Glausier J.R., Lewis D.A.</b>                                                                                                     | Dendritic spine pathology in schizophrenia                                                                                                                    | 2013 | Neuroscience                                                               | 251   | 90  | 107 | T&A | Excluded | wrong topic        |
| <b>Martín B., Fañanás L., Gutiérrez B., Chow E.W.C., Bassett A.S.</b>                                                                | Dermatoglyphic profile in 22q Deletion syndrome                                                                                                               | 2004 | American Journal of Medical Genetics - Neuropsychiatric Genetics           | 128 B | 46  | 49  | T&A | Excluded | wrong outcome      |
| <b>Zhao C., Tynan J., Ehrich M., Hannum G., McCullough R., Saldivar J.-S., Oeth P., Van Den Boom D., Deciu C.</b>                    | Detection of fetal subchromosomal abnormalities by sequencing circulating cell-free DNA from maternal plasma                                                  | 2015 | Clinical Chemistry                                                         | 61    | 608 | 616 | T&A | Excluded | wrong topic        |
| <b>Hrusca A., Rachisan A.L., Gach P., Pico H., Sorensen C., Bonello B., Ovaert C., Petit P., Fouilloux V., Mace L., Gorincour G.</b> | Detection of pulmonary and coronary artery anomalies in tetralogy of Fallot using non-ECG-gated CT angiography                                                | 2016 | Diagnostic and Interventional Imaging                                      | 97    | 543 | 548 | T&A | Excluded | wrong topic        |
| <b>Tan T.Y., Kilpatrick N., Farlie P.G.</b>                                                                                          | Developmental and genetic perspectives on pierre robin sequence                                                                                               | 2013 | American Journal of Medical Genetics, Part C: Seminars in Medical Genetics | 163   | 295 | 305 | T&A | Excluded | wrong topic        |
| <b>Paul L.K.</b>                                                                                                                     | Developmental malformation of the corpus callosum: A review of typical callosal development and examples of developmental disorders with callosal involvement | 2011 | Journal of Neurodevelopmental Disorders                                    | 3     | 3   | 27  | T&A | Excluded | wrong topic        |
| <b>Gothelf D., Penniman L., Gu E., Eliez S., Reiss A.L.</b>                                                                          | Developmental trajectories of brain structure in adolescents with 22q11.2 deletion syndrome: A longitudinal study                                             | 2007 | Schizophrenia Research                                                     | 96    | 72  | 81  | T&A | Excluded | wrong outcome      |
| <b>Schaer M., Debbané M., Bach Cuadra M., Ottet M.-C., Glaser B., Thiran J.-P., Eliez S.</b>                                         | Deviant trajectories of cortical maturation in 22q11.2 deletion syndrome (22q11DS): A cross-sectional and longitudinal study                                  | 2009 | Schizophrenia Research                                                     | 115   | 182 | 190 | T&A | Excluded | wrong outcome      |

|                                                                                                                                                                                                     |                                                                                                                                                       |      |                                                         |     |      |      |     |          |                    |
|-----------------------------------------------------------------------------------------------------------------------------------------------------------------------------------------------------|-------------------------------------------------------------------------------------------------------------------------------------------------------|------|---------------------------------------------------------|-----|------|------|-----|----------|--------------------|
| <b>Jamieson A., Smith C.J.</b>                                                                                                                                                                      | Dilated cardiomyopathy: A preventable presentation of DiGeorge syndrome                                                                               | 2015 | Journal of the Royal College of Physicians of Edinburgh | 45  | 273  | 275  | T&A | Excluded | wrong study design |
| <b>Chaoui R., Heling K.-S., Zhao Y., Sinkovskaya E., Abuhamad A., Karl K.</b>                                                                                                                       | Dilated cavum septi pellucidi in fetuses with microdeletion 22q11                                                                                     | 2016 | Prenatal Diagnosis                                      | 36  | 911  | 915  | T&A | Excluded | wrong outcome      |
| <b>Schmitt J.E., Yi J., Calkins M.E., Ruparel K., Roalf D.R., Cassidy A., Souders M.C., Satterthwaite T.D., McDonald-McGinn D.M., Zackai E.H., Gur R.C., Emanuel B.S., Gur R.E.</b>                 | Disrupted anatomic networks in the 22q11.2 deletion syndrome                                                                                          | 2016 | NeuroImage: Clinical                                    | 12  | 420  | 428  | T&A | Excluded | wrong outcome      |
| <b>Deng Y., Goodrich-Hunsaker N.J., Cabaral M., Amaral D.G., Buonocore M.H., Harvey D., Kalish K., Carmichael O.T., Schumann C.M., Lee A., Dougherty R.F., Perry L.M., Wandell B.A., Simon T.J.</b> | Disrupted fomic integrity in children with chromosome 22q11.2 deletion syndrome                                                                       | 2015 | Psychiatry Research - Neuroimaging                      | 232 | 106  | 114  | T&A | Excluded | wrong outcome      |
| <b>Classen C.F., Riehmer V., Landwehr C., Kosfeld A., Heilmann S., Scholz C., Kabisch S., Engels H., Tierling S., Zivicnjak M., Schacherer F., Haffner D., Weber R.G.</b>                           | Dissecting the genotype in syndromic intellectual disability using whole exome sequencing in addition to genome-wide copy number analysis             | 2013 | Human Genetics                                          | 132 | 825  | 841  | T&A | Excluded | wrong topic        |
| <b>Chen H.-I., Chien Y.-L., Liao H.-M., Chien W.-H., Chen C.-H., Chen Y.-C., Gau S.S.F.</b>                                                                                                         | Dosage of copy number variation at 22q11.2 mediates changes in cognition, social function and brain structure in autism spectrum disorder             | 2016 | Journal of the Formosan Medical Association             | 115 | 577  | 582  | T&A | Excluded | wrong outcome      |
| <b>Lania G., Zhang Z., Huynh T., Caprio C., Moon A.M., Vitelli F., Baldini A.</b>                                                                                                                   | Early thyroid development requires a Tbx1-Fgf8 pathway                                                                                                | 2009 | Developmental Biology                                   | 328 | 109  | 117  | T&A | Excluded | no human           |
| <b>Ushiroda J., Inoue S., Furuya H., Kawaguchi M.</b>                                                                                                                                               | Effective use of laryngeal mask airway to stop a supraglottic air leak which prevented adequate ventilation via a tracheostomy in a pediatric patient | 2013 | Japanese Journal of Anesthesiology                      | 62  | 1360 | 1361 | T&A | Excluded | wrong topic        |

|                                                                                                                                                                                                                                                                                                                                                                                                                                                                                                                                                                                                                                                                                                                                          |                                                                                                                                               |      |                                                                  |    |     |     |     |          |               |
|------------------------------------------------------------------------------------------------------------------------------------------------------------------------------------------------------------------------------------------------------------------------------------------------------------------------------------------------------------------------------------------------------------------------------------------------------------------------------------------------------------------------------------------------------------------------------------------------------------------------------------------------------------------------------------------------------------------------------------------|-----------------------------------------------------------------------------------------------------------------------------------------------|------|------------------------------------------------------------------|----|-----|-----|-----|----------|---------------|
| <b>Van Amelsvoort T., Zinkstok J., Figeo M., Daly E., Morris R., Owen M.J., Murphy K.C., De Haan L., Linszen D.H., Glaser B., Murphy D.G.M.</b>                                                                                                                                                                                                                                                                                                                                                                                                                                                                                                                                                                                          | Effects of a functional COMT polymorphism on brain anatomy and cognitive function in adults with velo-cardio-facial syndrome                  | 2008 | Psychological Medicine                                           | 38 | 89  | 100 | T&A | Excluded | wrong outcome |
| <b>Edelmann L., Funke B., Pandita R.K., Puech A., Saint-Lore B., Goldberg R., Shprintzen R., Kucherlapati R., Skoultsch A., Morrow B.E.</b>                                                                                                                                                                                                                                                                                                                                                                                                                                                                                                                                                                                              | Efforts to determine the molecular basis of VCFS                                                                                              | 1999 | Genetic Counseling                                               | 10 | 106 |     | T&A | Excluded | not available |
| <b>Zhou J., Pashmforoush M., Sucov H.M.</b>                                                                                                                                                                                                                                                                                                                                                                                                                                                                                                                                                                                                                                                                                              | Endothelial neuropilin disruption in mice causes digeorge syndrome-like malformations via mechanisms distinct to those caused by loss of tbx1 | 2012 | PLoS ONE                                                         | 7  |     |     | T&A | Excluded | no human      |
| <b>Delio M., Guo T., McDonald-McGinn D.M., Zackai E., Herman S., Kaminetzky M., Higgins A.M., Coleman K., Chow C., Jarlbrzkowski M., Bearden C.E., Bailey A., Vangkilde A., Olsen L., Olesen C., Skovby F., Werge T.M., Templin L., Busa T., Philip N., Swillen A., Vermeesch J.R., Devriendt K., Schneider M., Dahoun S., Eliez S., Schoch K., Hooper S.R., Shashi V., Samanich J., Marion R., Van Amelsvoort T., Boot E., Klaassen P., Duijff S.N., Vorstman J., Yuen T., Silversides C., Chow E., Bassett A., Frisch A., Weizman A., Gothelf D., Niarchou M., Van Den Bree M., Owen M.J., Suñer D.H., Andreo J.R., Armando M., Vicari S., Digilio M.C., Auton A., Kates W.R., Wang T., Shprintzen R.J., Emanuel B.S., Morrow B.E.</b> | Enhanced maternal origin of the 22q11.2 deletion in velocardiofacial and digeorge syndromes                                                   | 2013 | American Journal of Human Genetics                               | 92 | 439 | 447 | T&A | Excluded | wrong outcome |
| <b>Bingham P.M., Zimmerman R.A., McDonald-McGinn D., Driscoll D., Emanuel B.S., Zackai E.</b>                                                                                                                                                                                                                                                                                                                                                                                                                                                                                                                                                                                                                                            | Enlarged Sylvian fissures in infants with interstitial deletion of chromosome 22q11                                                           | 1997 | American Journal of Medical Genetics - Neuropsychiatric Genetics | 74 | 538 | 543 | T&A | Excluded | wrong outcome |

|                                                                                                                                                                                                                          |                                                                                                                                                                                                              |      |                                               |      |      |      |     |          |                  |
|--------------------------------------------------------------------------------------------------------------------------------------------------------------------------------------------------------------------------|--------------------------------------------------------------------------------------------------------------------------------------------------------------------------------------------------------------|------|-----------------------------------------------|------|------|------|-----|----------|------------------|
| <b>Wieczorek D., Shaw-Smith C., Kohlhase J., Schmitt W., Buiting K., Coffey A., Howard E., Hehr U., Gillessen-Kaesbach G.</b>                                                                                            | Esophageal atresia, hypoplasia of zygomatic complex, microcephaly, cup-shaped ears, congenital heart defect, and mental retardation - New MCA/MR syndrome in two affected sibs and a mildly affected mother? | 2007 | American Journal of Medical Genetics, Part A  | 143  | 1135 | 1142 | T&A | Excluded | wrong topic      |
| <b>Betancur C.</b>                                                                                                                                                                                                       | Etiological heterogeneity in autism spectrum disorders: More than 100 genetic and genomic disorders and still counting                                                                                       | 2011 | Brain Research                                | 1380 | 42   | 77   | T&A | Excluded | wrong topic      |
| <b>Deng J.-Y., Zhang Z.-W., Li J.-H., Zhu Y.-N., Yang J.-B., Gao Z., Ying L.-Y.</b>                                                                                                                                      | Evaluation of detection and analysis of chromosome 22q11.2 microdeletion by multiple ligation-dependent probe amplification assay                                                                            | 2011 | Chinese Journal of Medical Genetics           | 28   | 190  | 194  | T&A | Excluded | foreign language |
| <b>Stoll C., Garne E., Clementi M.</b>                                                                                                                                                                                   | Evaluation of prenatal diagnosis of associated congenital heart diseases by fetal ultrasonographic examination in Europe                                                                                     | 2001 | Prenatal Diagnosis                            | 21   | 243  | 252  | T&A | Excluded | wrong topic      |
| <b>Shashi V., Kwapil T.R., Kaczorowski J., Berry M.N., Santos C.S., Howard T.D., Goradia D., Prasad K., Vaibhav D., Rajarethinam R., Spence E., Keshavan M.S.</b>                                                        | Evidence of gray matter reduction and dysfunction in chromosome 22q11.2 deletion syndrome                                                                                                                    | 2010 | Psychiatry Research - Neuroimaging            | 181  | 1    | 8    | T&A | Excluded | wrong outcome    |
| <b>Wapner R.J., Babiarz J.E., Levy B., Stosic M., Zimmermann B., Sigurjonsson S., Wayham N., Ryan A., Banjevic M., Lacroute P., Hu J., Hall M.P., Demko Z., Siddiqui A., Rabinowitz M., Gross S.J., Hill M., Benn P.</b> | Expanding the scope of noninvasive prenatal testing: Detection of fetal microdeletion syndromes                                                                                                              | 2015 | American Journal of Obstetrics and Gynecology | 212  | 3320 | 3320 | T&A | Excluded | wrong topic      |

|                                                                                                                     |                                                                                                                                                  |      |                                                                         |     |      |      |     |          |                    |
|---------------------------------------------------------------------------------------------------------------------|--------------------------------------------------------------------------------------------------------------------------------------------------|------|-------------------------------------------------------------------------|-----|------|------|-----|----------|--------------------|
| <b>Klaassen P., Duijff S., Swanenburg de Veye H., Beemer F., Sinnema G., Breetvelt E., Schappin R., Vorstman J.</b> | Explaining the variable penetrance of CNVs: Parental intelligence modulates expression of intellectual impairment caused by the 22q11.2 deletion | 2016 | American Journal of Medical Genetics, Part B: Neuropsychiatric Genetics | 171 | 790  | 796  | T&A | Excluded | wrong outcome      |
| <b>Spruijt N.E., Sameer Rana M.S., Christoffels V.M., Mink van der Molen A.B.</b>                                   | Exploring a neurogenic basis of velopharyngeal dysfunction in Tbx1 mutant mice: No difference in volumes of the nucleus ambiguus                 | 2013 | International Journal of Pediatric Otorhinolaryngology                  | 77  | 1002 | 1007 | T&A | Excluded | no human           |
| <b>Zhou H., Perkins S.L., Tripp S., Hussong J.W., Coffin C.M.</b>                                                   | Expression of apoptosis-related antigens, Fas, bcl-2, p53, and Mib-1 proliferation index in the hypoplastic thymus of DiGeorge syndrome          | 2002 | Pediatric and Developmental Pathology                                   | 5   | 465  | 471  | T&A | Excluded | wrong outcome      |
| <b>Markert M.L., Devlin B.H., Chinn I.K., McCarthy E.A., Li Y.J.</b>                                                | Factors affecting success of thymus transplantation for complete DiGeorge anomaly                                                                | 2008 | American Journal of Transplantation                                     | 8   | 1729 | 1736 | T&A | Excluded | wrong outcome      |
| <b>Adeyinka A., Stockero K.J., Flynn H.C., Lorentz C.P., Ketterling R.P., Jalal S.M.</b>                            | Familial 22q11.2 deletions in DiGeorge/velocardiofacial syndrome are predominantly smaller than the commonly observed 3Mb                        | 2004 | Genetics in Medicine                                                    | 6   | 517  | 520  | FT  | Excluded | incomplete outcome |
| <b>Harrell W., Eack S., Hooper S.R., Keshavan M.S., Bonner M.S., Schoch K., Shashi V.</b>                           | Feasibility and preliminary efficacy data from a computerized cognitive intervention in children with chromosome 22q11.2 deletion syndrome       | 2013 | Research in Developmental Disabilities                                  | 34  | 2606 | 2613 | T&A | Excluded | wrong outcome      |
| <b>Zhao Y., Edington S., Fleenor J., Sinkovskaya E., Porche L., Abuhamad A.</b>                                     | Fetal cardiac axis in tetralogy of Fallot: associations with prenatal findings, genetic anomalies and postnatal outcome                          | 2017 | Ultrasound in Obstetrics and Gynecology                                 | 50  | 58   | 62   | T&A | Excluded | wrong topic        |
| <b>Van L., Butcher N.J., Costain G., Ogura L., Chow E.W.C., Bassett A.S.</b>                                        | Fetal growth and gestational factors as predictors of schizophrenia in 22q11.2 deletion syndrome                                                 | 2016 | Genetics in Medicine                                                    | 18  | 350  | 355  | T&A | Excluded | wrong outcome      |

|                                                                                                                                                                          |                                                                                                                                                                                |      |                                                           |     |     |     |     |          |               |
|--------------------------------------------------------------------------------------------------------------------------------------------------------------------------|--------------------------------------------------------------------------------------------------------------------------------------------------------------------------------|------|-----------------------------------------------------------|-----|-----|-----|-----|----------|---------------|
| <b>D'Antonio F., Khalil A., Zidere V., Carvalho J.S.</b>                                                                                                                 | Fetuses with right aortic arch: A multicenter cohort study and meta-analysis                                                                                                   | 2016 | Ultrasound in Obstetrics and Gynecology                   | 47  | 423 | 432 | T&A | Excluded | wrong topic   |
| <b>Bartsch O., Rasi S., Hoffmann K., Blin N.</b>                                                                                                                         | FISH of supernumerary marker chromosomes (SMCs) identifies six diagnostically relevant intervals on chromosome 22q and a novel type of bisatellited SMC (22)                   | 2005 | European Journal of Human Genetics                        | 13  | 592 | 598 | T&A | Excluded | wrong topic   |
| <b>McClean-Tooke A., Barge D., Spickett G.P., Gennery A.R.</b>                                                                                                           | Flow Cytometric Analysis of TCR Vβ Repertoire in Patients with 22q11.2 Deletion Syndrome                                                                                       | 2011 | Scandinavian Journal of Immunology                        | 73  | 577 | 585 | T&A | Excluded | wrong outcome |
| <b>Latger-Cannard V., Bensoussan D., Grégoire M.-J., Marcon F., Cloez J.-L., Leheup B., Jonveaux P., Lecompte T., Bordigoni P.</b>                                       | Frequency of thrombocytopenia and large platelets correlates neither with conotruncal cardiac anomalies nor immunological features in the chromosome 22q11.2 deletion syndrome | 2004 | European Journal of Pediatrics                            | 163 | 327 | 328 | T&A | Excluded | wrong outcome |
| <b>Schaer M., Eliez S.</b>                                                                                                                                               | From Genes to Brain: Understanding Brain Development in Neurogenetic Disorders Using Neuroimaging Techniques                                                                   | 2007 | Child and Adolescent Psychiatric Clinics of North America | 16  | 557 | 579 | T&A | Excluded | wrong topic   |
| <b>Kates W.R., Burnette C.P., Bessette B.A., Folley B.S., Strunge L., Jabs E., Pearlson G.D.</b>                                                                         | Frontal and caudate alterations in velocardiofacial syndrome (deletion at chromosome 22q11.2)                                                                                  | 2004 | Journal of Child Neurology                                | 19  | 337 | 342 | T&A | Excluded | wrong outcome |
| <b>Harrell W., Zou L., Englander Z., Hooper S.R., Keshavan M.S., Song A., Shashi V.</b>                                                                                  | Frontal Hypoactivation during a Working Memory Task in Children with 22q11 Deletion Syndrome                                                                                   | 2017 | Journal of Child Neurology                                | 32  | 94  | 99  | T&A | Excluded | wrong outcome |
| <b>Kempf L., Nicodemus K.K., Kolachana B., Vakkalanka R., Verchinski B.A., Egan M.F., Straub R.E., Mattay V.A., Callicott J.H., Weinberger D.R., Meyer-Lindenberg A.</b> | Functional polymorphisms in PRODH are associated with risk and protection for schizophrenia and fronto-striatal structure and function                                         | 2008 | PLoS Genetics                                             | 4   |     |     | T&A | Excluded | wrong outcome |

|                                                                                                                                                                     |                                                                                                                           |      |                                     |     |     |     |     |          |                    |
|---------------------------------------------------------------------------------------------------------------------------------------------------------------------|---------------------------------------------------------------------------------------------------------------------------|------|-------------------------------------|-----|-----|-----|-----|----------|--------------------|
| <b>Lindquist S.G., Kirchhoff M., Lundsteen C., Pedersen W., Erichsen G., Kristensen K., Lillquist K., Smedegaard H.H., Skov L., Tommerup N., Brøndum-Nielsen K.</b> | Further delineation of the 22q13 deletion syndrome                                                                        | 2005 | Clinical Dysmorphology              | 14  | 55  | 60  | T&A | Excluded | wrong topic        |
| <b>Ferreira L.M.R.</b>                                                                                                                                              | Gammadelta T Cells: Innately adaptive immune cells                                                                        | 2013 | International Reviews of Immunology | 32  | 223 | 248 | T&A | Excluded | wrong topic        |
| <b>Kates W.R., Antshel K., Willhite R., Bessette B.A., AbdulSabur N., Higgins A.M.</b>                                                                              | Gender-moderated dorsolateral prefrontal reductions in 22q11.2 Deletion Syndrome: Implications for risk for schizophrenia | 2005 | Child Neuropsychology               | 11  | 73  | 85  | T&A | Excluded | wrong outcome      |
| <b>Kwiatkowska J., Wierzba J., Aleszewicz-Baranowska J., Ereciński J.</b>                                                                                           | Genetic background of congenital conotruncal heart defects - A study of 45 families                                       | 2007 | Kardiologia Polska                  | 65  | 32  | 37  | FT  | Excluded | incomplete outcome |
| <b>Baker K., Raymond F.L., Bass N.</b>                                                                                                                              | Genetic investigation for adults with intellectual disability: Opportunities and challenges                               | 2012 | Current Opinion in Neurology        | 25  | 150 | 158 | T&A | Excluded | wrong topic        |
| <b>Berdasco M., Esteller M.</b>                                                                                                                                     | Genetic syndromes caused by mutations in epigenetic genes                                                                 | 2013 | Human Genetics                      | 132 | 359 | 383 | T&A | Excluded | wrong topic        |
| <b>Muir W.J.</b>                                                                                                                                                    | Genetics advances and learning disability                                                                                 | 2000 | British Journal of Psychiatry       | 176 | 12  | 19  | T&A | Excluded | wrong topic        |
| <b>Llevadot R., Scambler P., Estivill X., Pritchard M.</b>                                                                                                          | Genomic organization of TUPLE1/HIRA: A gene implicated in DiGeorge syndrome                                               | 1996 | Mammalian Genome                    | 7   | 911 | 914 | T&A | Excluded | no human           |



|                                                                                                                                                                                                                                                                                                                                                                                                                             |                                                                                                                                                                       |      |                                 |    |      |      |     |          |               |
|-----------------------------------------------------------------------------------------------------------------------------------------------------------------------------------------------------------------------------------------------------------------------------------------------------------------------------------------------------------------------------------------------------------------------------|-----------------------------------------------------------------------------------------------------------------------------------------------------------------------|------|---------------------------------|----|------|------|-----|----------|---------------|
| <b>Guo T., Mcdonald-Mcginn D., Blonska A., Shanske A., Bassett A.S., Chow E., Bowser M., Sheridan M., Beemer F., Devriendt K., Swillen A., Breckpot J., Digilio M.C., Marino B., Dallapiccola B., Carpenter C., Zheng X., Johnson J., Chung J., Higgins A.M., Philip N., Simon T.J., Coleman K., Heine-Suner D., Rosell J., Kates W., Devoto M., Goldmuntz E., Zackai E., Wang T., Shprintzen R., Emanuel R., Morrow P.</b> | Genotype and cardiovascular phenotype correlations with TBX1 in 1,022 velo-cardio-facial/digeorge/22q11.2 deletion syndrome patients                                  | 2011 | Human Mutation                  | 32 | 1278 | 1289 | T&A | Excluded | wrong outcome |
| <b>Michaelovsky E., Frisch A., Carmel M., Patya M., Zarchi O., Green T., Basel-Vanagaite L., Weizman A., Gothelf D.</b>                                                                                                                                                                                                                                                                                                     | Genotype-phenotype correlation in 22q11.2 deletion syndrome                                                                                                           | 2012 | BMC Medical Genetics            | 13 |      |      | FT  | Included |               |
| <b>Eyske B., Devriendt S.K., Vermylrn J., Hoylaerts M.K., Fryns J.P., Gewillig M., Van Geet C.</b>                                                                                                                                                                                                                                                                                                                          | Giant platelets in velo-cardio-facial syndrome                                                                                                                        | 1999 | Genetic Counseling              | 10 | 113  |      | T&A | Excluded | wrong outcome |
| <b>Saint-Jore B., Puech A., Heyer J., Lin Q., Raine C., Kucherlapati R., Skoultchi A.I.</b>                                                                                                                                                                                                                                                                                                                                 | Goosecoid-like (Gsc), a candidate gene for velocardiofacial syndrome, is not essential for normal mouse development                                                   | 1998 | Human Molecular Genetics        | 7  | 1841 | 1849 | T&A | Excluded | no human      |
| <b>Ottet M.-C., Schaer M., Debbané M., Cammoun L., Thiran J.-P., Eliez S.</b>                                                                                                                                                                                                                                                                                                                                               | Graph theory reveals dysconnected hubs in 22q11DS and altered nodal efficiency in patients with hallucinations                                                        | 2012 | Frontiers in Human Neuroscience |    |      |      | T&A | Excluded | wrong outcome |
| <b>O'Driscoll M.</b>                                                                                                                                                                                                                                                                                                                                                                                                        | Haploinsufficiency of DNA damage response genes and their potential influence in human genomic disorders                                                              | 2008 | Current Genomics                | 9  | 137  | 146  | T&A | Excluded | wrong topic   |
| <b>Devaraju P., Yu J., Eddins D., Mellado-Lagarde M.M., Earls L.R., Westmoreland J.J., Quarato G., Green D.R., Zakharenko S.S.</b>                                                                                                                                                                                                                                                                                          | Haploinsufficiency of the 22q11.2 microdeletion gene Mrpl40 disrupts short-term synaptic plasticity and working memory through dysregulation of mitochondrial calcium | 2017 | Molecular Psychiatry            | 22 | 1313 | 1326 | T&A | Excluded | no human      |

|                                                                                                                                                                                                                                                                 |                                                                                                                                                      |      |                                             |     |      |      |     |          |               |
|-----------------------------------------------------------------------------------------------------------------------------------------------------------------------------------------------------------------------------------------------------------------|------------------------------------------------------------------------------------------------------------------------------------------------------|------|---------------------------------------------|-----|------|------|-----|----------|---------------|
| <b>Wright D.T., Nguyen S.A., Teufel R.J., II, White D.R.</b>                                                                                                                                                                                                    | Health care resource use in patients with and without 22q11.2 deletion syndrome undergoing sphincter pharyngoplasty for velopharyngeal insufficiency | 2017 | JAMA Otolaryngology - Head and Neck Surgery | 143 | 286  | 291  | T&A | Excluded | wrong outcome |
| <b>Medelros P.M., Alembik Y., De Ceker B., Livolai A., Soskin S., Gilgenkrantz S., Stoll C.</b>                                                                                                                                                                 | Heterogeneity of clinical features in catch22 syndrome                                                                                               | 1999 | Genetic Counseling                          | 10  | 99   |      | T&A | Excluded | not available |
| <b>Liang H.P.H., Morel-Kopp M.-C., Curtin J., Wilson M., Hewson J., Chen W., Ward C.M.</b>                                                                                                                                                                      | Heterozygous loss of platelet glycoprotein (GP) Ib-V-IX variably affects platelet function in velocardiofacial syndrome (VCFS) patients              | 2007 | Thrombosis and Haemostasis                  | 98  | 1298 | 1308 | T&A | Excluded | wrong outcome |
| <b>Nik-Zainal S., Strick R., Storer M., Huang N., Rad R., Willatt L., Fitzgerald T., Martin V., Sandford R., Carter N.P., Janecke A.R., Renner S.P., Oppelt P.G., Oppelt P., Schulze C., Brucker S., Hurles M., Beckmann M.W., Strissel P.L., Shaw-Smith C.</b> | High incidence of recurrent copy number variants in patients with isolated and syndromic Müllerian aplasia                                           | 2011 | Journal of Medical Genetics                 | 48  | 197  | 204  | T&A | Excluded | wrong topic   |
| <b>Fernández L., Lapunzina P., López Pajares I., Rodríguez Criado G., García-Guereta L., Pérez J., Quero J., Delicado A.</b>                                                                                                                                    | Higher frequency of uncommon 1.5-2 Mb deletions found in familial cases of 22q11.2 deletion syndrome                                                 | 2005 | American Journal of Medical Genetics        | 136 | 71   | 75   | FT  | Included |               |
| <b>Debbané M., Schaer M., Farhoumand R., Glaser B., Eliez S.</b>                                                                                                                                                                                                | Hippocampal volume reduction in 22q11.2 deletion syndrome                                                                                            | 2006 | Neuropsychologia                            | 44  | 2360 | 2365 | T&A | Excluded | wrong outcome |
| <b>DeBoer T., Wu Z., Lee A., Simon T.J.</b>                                                                                                                                                                                                                     | Hippocampal volume reduction in children with chromosome 22q11.2 deletion syndrome is associated with cognitive impairment                           | 2007 | Behavioral and Brain Functions              | 3   |      |      | T&A | Excluded | wrong outcome |

|                                                                                                                                                              |                                                                                                                                          |      |                                      |     |     |     |     |          |                    |
|--------------------------------------------------------------------------------------------------------------------------------------------------------------|------------------------------------------------------------------------------------------------------------------------------------------|------|--------------------------------------|-----|-----|-----|-----|----------|--------------------|
| <b>Flahault A., Schaer M., Ottet M.-C., Debbané M., Eliez S.</b>                                                                                             | Hippocampal volume reduction in chromosome 22q11.2 deletion syndrome (22q11.2DS): A longitudinal study of morphometry and symptomatology | 2012 | Psychiatry Research - Neuroimaging   | 203 | 1   | 5   | T&A | Excluded | wrong outcome      |
| <b>Widdershoven J.C.C., Spruijt N.E., Spliet W.G.M., Breugem C.C., Kon M., van der Molen A.B.M.</b>                                                          | Histology of the pharyngeal constrictor muscle in 22q11.2 deletion syndrome and non-syndromic children with velopharyngeal insufficiency | 2011 | PLoS ONE                             | 6   |     |     | T&A | Excluded | wrong outcome      |
| <b>Hudson L.L., Louise Markert M., Devlin B.H., Haynes B.F., Sempowski G.D.</b>                                                                              | Human T cell reconstitution in DiGeorge syndrome and HIV-1 infection                                                                     | 2007 | Seminars in Immunology               | 19  | 297 | 309 | T&A | Excluded | wrong study design |
| <b>Raghavan V., Bhomia M., Torres I., Jain S., Wang K.K.</b>                                                                                                 | Hypothesis: Exosomal microRNAs as potential biomarkers for schizophrenia                                                                 | 2017 | Medical Hypotheses                   | 103 | 21  | 25  | T&A | Excluded | wrong topic        |
| <b>Jawad A.F., McDonald-McGinn D.M., Zackai E., Sullivan K.E.</b>                                                                                            | Immunologic features of chromosome 22q11.2 deletion syndrome (DiGeorge syndrome/velocardiofacial syndrome)                               | 2001 | Journal of Pediatrics                | 139 | 715 | 723 | T&A | Excluded | wrong outcome      |
| <b>Lazar D.A., Cass D.L., Rodriguez M.A., Hassan S.F., Cassady C.I., Johnson Y.R., Johnson K.E., Johnson A., Moise K.J., Belleza-Bascon B., Olutoye O.O.</b> | Impact of prenatal evaluation and protocol-based perinatal management on congenital diaphragmatic hernia outcomes                        | 2011 | Journal of Pediatric Surgery         | 46  | 808 | 813 | T&A | Excluded | wrong topic        |
| <b>Cuturilo G., Drakulic D., Jovanovic I., Krstic A., Djukic M., Skoric D., Mijovic M., Stefanovic I., Milivojevic M., Stevanovic M.</b>                     | Improving the diagnosis of children with 22q11.2 deletion syndrome: A single-center experience from Serbia                               | 2016 | Indian Pediatrics                    | 53  | 786 | 789 | FT  | Excluded | incomplete outcome |
| <b>Rauch A., Hofbeck M., Leipold G., Klinge J., Trautmann U., Kirsch M., Singer H., Pfeiffer R.A.</b>                                                        | Incidence and significance of 22q11.2 hemizyosity in patients with interrupted aortic arch                                               | 1998 | American Journal of Medical Genetics | 78  | 322 | 331 | FT  | Excluded | incomplete outcome |
| <b>Maisenbacher M.K., Merrion K., Pettersen B., Young M., Paik K., Iyengar S., Kareht S., Sigurjonsson S., Demko Z.P., Martin K.A.</b>                       | Incidence of the 22q11.2 deletion in a large cohort of miscarriage samples                                                               | 2017 | Molecular Cytogenetics               | 10  |     |     | T&A | Excluded | wrong outcome      |

|                                                                                                                                                                                    |                                                                                                                                                             |      |                                                                 |     |      |      |     |          |               |
|------------------------------------------------------------------------------------------------------------------------------------------------------------------------------------|-------------------------------------------------------------------------------------------------------------------------------------------------------------|------|-----------------------------------------------------------------|-----|------|------|-----|----------|---------------|
| <b>Schmitt J.E., Yi J.J., Roalf D.R., Loevner L.A., Ruparel K., Whinna D., Souders M.C., Mcdonald-Mcgin D.M., Yodh E., Vekar S., Zackai E.H., Gur R.C., Emanuel B.S., Gur R.E.</b> | Incidental radiologic findings in the 22q11.2 deletion syndrome                                                                                             | 2014 | American Journal of Neuroradiology                              | 35  | 2186 | 2191 | T&A | Excluded | wrong outcome |
| <b>Eliez S., Barnea-Goraly N., Schmitt J.E., Liu Y., Reiss A.L.</b>                                                                                                                | Increased basal ganglia volumes in velo-cardio-facial syndrome (deletion 22q11.2)                                                                           | 2002 | Biological Psychiatry                                           | 52  | 68   | 70   | T&A | Excluded | wrong outcome |
| <b>Shashi V., Francis A., Hooper S.R., Kranz P.G., Zapadka M., Schoch K., Ip E., Tandon N., Howard T.D., Keshavan M.S.</b>                                                         | Increased corpus callosum volume in children with chromosome 22q11.2 deletion syndrome is associated with neurocognitive deficits and genetic polymorphisms | 2012 | European Journal of Human Genetics                              | 20  | 1051 | 1057 | T&A | Excluded | wrong outcome |
| <b>Beaton E.A., Qin Y., Nguyen V., Johnson J., Pinter J.D., Simon T.J.</b>                                                                                                         | Increased incidence and size of cavum septum pellucidum in children with chromosome 22q11.2 deletion syndrome                                               | 2010 | Psychiatry Research - Neuroimaging                              | 181 | 108  | 113  | T&A | Excluded | wrong outcome |
| <b>Giersch A., Glaser B., Pasca C., Chabroz M., Debbané M., Eliez S.</b>                                                                                                           | Individuals with 22q11.2 deletion syndrome are impaired at explicit, but not implicit, discrimination of local forms embedded in global structures          | 2014 | American Journal on Intellectual and Developmental Disabilities | 119 | 261  | 275  | T&A | Excluded | wrong outcome |
| <b>Samanta D.</b>                                                                                                                                                                  | Infantile spasms in Williams–Beuren syndrome with typical deletions of the 7q11.23 critical region and a review of the literature                           | 2017 | Acta Neurologica Belgica                                        | 117 | 359  | 362  | T&A | Excluded | wrong topic   |
| <b>Hantash F.M., Wang B.T., Owen R., Ross L.P., Mahon L.W., Boyar F.Z., Anguiano A., Strom C.M.</b>                                                                                | Inherited and de novo 22q11.2 distal duplications in two patients with autistic features, speech delay and no dysmorphology                                 | 2012 | Journal of Pediatric Genetics                                   | 1   | 115  | 124  | T&A | Excluded | wrong topic   |
| <b>Cox K., Price V., Kahr W.H.</b>                                                                                                                                                 | Inherited platelet disorders: A clinical approach to diagnosis and management                                                                               | 2011 | Expert Review of Hematology                                     | 4   | 455  | 472  | T&A | Excluded | wrong topic   |
| <b>Nurden A.T., Nurden P.</b>                                                                                                                                                      | Inherited thrombocytopenias                                                                                                                                 | 2007 | Haematologica                                                   | 92  | 1158 | 1164 | T&A | Excluded | wrong topic   |

|                                                                                                                                                                                                                                                        |                                                                                                                                                                                          |      |                                              |     |      |      |     |          |                    |
|--------------------------------------------------------------------------------------------------------------------------------------------------------------------------------------------------------------------------------------------------------|------------------------------------------------------------------------------------------------------------------------------------------------------------------------------------------|------|----------------------------------------------|-----|------|------|-----|----------|--------------------|
| <b>Walter E., Mazaika P.K., Reiss A.L.</b>                                                                                                                                                                                                             | Insights into brain development from neurogenetic syndromes: Evidence from fragile X syndrome, Williams syndrome, Turner syndrome and velocardiofacial syndrome                          | 2009 | Neuroscience                                 | 164 | 257  | 271  | T&A | Excluded | wrong study design |
| <b>De Smedt B., Devriendt K., Fryns J.-P., Vogels A., Gewillig M., Swillen A.</b>                                                                                                                                                                      | Intellectual abilities in a large sample of children with Velo-Cardio-Facial Syndrome: An update                                                                                         | 2007 | Journal of Intellectual Disability Research  | 51  | 666  | 670  | T&A | Excluded | wrong outcome      |
| <b>Cirillo E., Giardino G., Gallo V., Puliafito P., Azzari C., Bacchetta R., Cardinale F., Cicalese M.P., Consolini R., Martino S., Martire B., Molinatto C., Plebani A., Scarano G., Soresina A., Cancrini C., Rossi P., Digilio M.C., Pignata C.</b> | Intergenerational and intrafamilial phenotypic variability in 22q11.2 Deletion syndrome subjects                                                                                         | 2014 | BMC Medical Genetics                         | 15  |      |      | T&A | Excluded | wrong outcome      |
| <b>Fernández R.M., Sánchez J., García-Díaz L., Peláez-Nora Y., González-Meneses A., Antiñolo G., Borrego S.</b>                                                                                                                                        | Interstitial 10p deletion derived from a maternal ins(16;10)(q22;p13p15.2): Report of the first familial case of 10p monosomy affecting to two familial members of different generations | 2016 | American Journal of Medical Genetics, Part A | 170 | 1268 | 1273 | T&A | Excluded | wrong topic        |
| <b>Yatsenko S.A., Yatsenko A.N., Szigeti K., Craigen W.J., Stankiewicz P., Cheung S.W., Lupski J.R.</b>                                                                                                                                                | Interstitial deletion of 10p and atrial septal defect in DiGeorge 2 syndrome                                                                                                             | 2004 | Clinical Genetics                            | 66  | 128  | 136  | T&A | Excluded | wrong study design |
| <b>Barnea-Goraly N., Menon V., Krasnow B., Ko A., Reiss A., Eliez S.</b>                                                                                                                                                                               | Investigation of white matter structure in velocardiofacial syndrome: A diffusion tensor imaging study                                                                                   | 2003 | American Journal of Psychiatry               | 160 | 1863 | 1869 | T&A | Excluded | wrong outcome      |
| <b>Reish O., Finkelstein Y., Mesterman R., Nachmani A., Wolach B., Fejgin M., Amiel A.</b>                                                                                                                                                             | Is isolated palatal anomaly an indication to screen for 22q11 region deletion?                                                                                                           | 2003 | Cleft Palate-Craniofacial Journal            | 40  | 176  | 179  | T&A | Excluded | wrong outcome      |

|                                                                                             |                                                                                                                                                           |      |                                                                   |     |      |      |     |          |                    |
|---------------------------------------------------------------------------------------------|-----------------------------------------------------------------------------------------------------------------------------------------------------------|------|-------------------------------------------------------------------|-----|------|------|-----|----------|--------------------|
| <b>Funke B., Puech A., Saint-Jore B., Pandita R., Skoultchi A., Morrow B.</b>               | Isolation and characterization of a human gene containing a nuclear localization signal from the critical region for velo-cardio-facial syndrome on 22q11 | 1998 | Genomics                                                          | 53  | 146  | 154  | T&A | Excluded | no human           |
| <b>Locke B.A., Dasu T., Verbsky J.W.</b>                                                    | Laboratory diagnosis of primary immunodeficiencies                                                                                                        | 2014 | Clinical Reviews in Allergy and Immunology                        | 46  | 154  | 168  | T&A | Excluded | wrong topic        |
| <b>Cuneo B.F., Langman C.B., Ilbawi M.N., Ramakrishnan V., Cutilletta A., Driscoll D.A.</b> | Latent hypoparathyroidism in children with conotruncal cardiac defects                                                                                    | 1996 | Circulation                                                       | 93  | 1702 | 1708 | T&A | Excluded | wrong outcome      |
| <b>Erdödi L., Lajiness-O'Neill R., Schmitt T.A.</b>                                         | Learning curve analyses in neurodevelopmental disorders: Are children with autism spectrum disorder truly visual learners?                                | 2013 | Journal of Autism and Developmental Disorders                     | 43  | 880  | 890  | T&A | Excluded | wrong topic        |
| <b>Scariati E., Padula M.C., Schaer M., Eliez S.</b>                                        | Long-range dysconnectivity in frontal and midline structures is associated to psychosis in 22q11.2 deletion syndrome                                      | 2016 | Journal of Neural Transmission                                    | 123 | 823  | 839  | T&A | Excluded | wrong study design |
| <b>Radoeva P.D., Bansal R., Antshel K.M., Fremont W., Peterson B.S., Kates W.R.</b>         | Longitudinal study of cerebral surface morphology in youth with 22q11.2 deletion syndrome, and association with positive symptoms of psychosis            | 2017 | Journal of Child Psychology and Psychiatry and Allied Disciplines | 58  | 305  | 314  | T&A | Excluded | wrong outcome      |
| <b>Lima K., Abrahamsen T.G., Foelling I., Natvig S., Ryder L.P., Olausson R.W.</b>          | Low thymic output in the 22q11.2 deletion syndrome measured by CCR9 +CD45RA+ T cell counts and T cell receptor rearrangement excision circles             | 2010 | Clinical and Experimental Immunology                              | 161 | 98   | 107  | T&A | Excluded | wrong outcome      |
| <b>Mishra P.K.</b>                                                                          | Management strategies for interrupted aortic arch with associated anomalies                                                                               | 2009 | European Journal of Cardio-thoracic Surgery                       | 35  | 569  | 576  | T&A | Excluded | wrong topic        |
| <b>Samuels I.S., Saitta S.C., Landreth G.E.</b>                                             | MAP'ing CNS Development and Cognition: An ERKsome Process                                                                                                 | 2009 | Neuron                                                            | 61  | 160  | 167  | T&A | Excluded | wrong topic        |

|                                                                                                                                                                                         |                                                                                                                         |      |                                                     |     |      |      |     |          |                    |
|-----------------------------------------------------------------------------------------------------------------------------------------------------------------------------------------|-------------------------------------------------------------------------------------------------------------------------|------|-----------------------------------------------------|-----|------|------|-----|----------|--------------------|
| <b>Lin A., Ching C.R.K., Vajdi A., Sun D., Jonas R.K., Jalbrzikowski M., Kushan-Wells L., Hansen L.P., Krikorian E., Gutman B., Dokoru D., Helleman G., Thompson P.M., Bearden C.E.</b> | Mapping 22q11.2 gene dosage effects on brain morphometry                                                                | 2017 | Journal of Neuroscience                             | 37  | 6183 | 6199 | T&A | Excluded | wrong outcome      |
| <b>Dennis E.L., Thompson P.M.</b>                                                                                                                                                       | Mapping connectivity in the developing brain                                                                            | 2013 | International Journal of Developmental Neuroscience | 31  | 525  | 542  | T&A | Excluded | wrong topic        |
| <b>Hwang V.J., Maar D., Regan J., Angkustsiri K., Simon T.J., Tassone F.</b>                                                                                                            | Mapping the deletion endpoints in individuals with 22q11.2 Deletion Syndrome by droplet digital PCR                     | 2014 | BMC Medical Genetics                                | 15  |      |      | FT  | Included |                    |
| <b>De Smedt B., Swillen A., Devriendt K., Fryns J.P., Verschaffel L., Ghesquière P.</b>                                                                                                 | Mathematical disabilities in children with velo-cardio-facial syndrome                                                  | 2007 | Neuropsychologia                                    | 45  | 885  | 895  | T&A | Excluded | wrong outcome      |
| <b>De Smedt B., Swillen A., Devriendt K., Fryns J.P., Verschaffel L., Ghesquière P.</b>                                                                                                 | Mathematical disabilities in young primary school children with velo-cardio-facial syndrome                             | 2006 | Genetic Counseling                                  | 17  | 259  | 280  | T&A | Excluded | wrong outcome      |
| <b>Shashi V., Berry M.N., Keshavan M.S.</b>                                                                                                                                             | Mechanistic approach to understanding psychosis risk in velocardiofacial syndrome                                       | 2009 | Current Pediatric Reviews                           | 5   | 89   | 104  | T&A | Excluded | wrong study design |
| <b>Tan G.M., Arnone D., McIntosh A.M., Ebmeier K.P.</b>                                                                                                                                 | Meta-analysis of magnetic resonance imaging studies in chromosome 22q11.2 deletion syndrome (velocardiofacial syndrome) | 2009 | Schizophrenia Research                              | 115 | 173  | 181  | T&A | Excluded | wrong outcome      |
| <b>Kerstjens-Frederikse W.S., Kurahashi H., Driscoll D.A., Budarf M.L., Emanuel B.S., Beatty B., Scheidl T., Siegel-Bartelt J., Henderson K., Cytrynbaum C., Nie G., Teshima I.</b>     | Microdeletion 22q11.2: Clinical data and deletion size                                                                  | 1999 | Journal of Medical Genetics                         | 36  | 721  | 723  | FT  | Excluded | incomplete outcome |
| <b>Carvill G.L., Mefford H.C.</b>                                                                                                                                                       | Microdeletion syndromes                                                                                                 | 2013 | Current Opinion in Genetics and Development         | 23  | 232  | 239  | T&A | Excluded | wrong topic        |
| <b>Seemanová E.</b>                                                                                                                                                                     | Microdeletion syndromes [Mikrodeleční syndromy.]                                                                        | 2002 | Casopis Lekarů Ceských                              | 141 | 363  | 370  | T&A | Excluded | wrong topic        |

|                                                                                                                                                                                                                                                         |                                                                                                                                                                                                                                          |      |                                              |     |      |      |     |          |                    |
|---------------------------------------------------------------------------------------------------------------------------------------------------------------------------------------------------------------------------------------------------------|------------------------------------------------------------------------------------------------------------------------------------------------------------------------------------------------------------------------------------------|------|----------------------------------------------|-----|------|------|-----|----------|--------------------|
| <b>Ensenauer R.E., Adeyinka A., Flynn H.C., Michels V.V., Lindor N.M., Dawson D.B., Thorland E.C., Lorentz C.P., Goldstein J.L., McDonald M.T., Smith W.E., Simon-Fayard E., Alexander A.A., Kulharya A.S., Ketterling R.P., Clark R.D., Jalal S.M.</b> | Microduplication 22q11.2, an Emerging Syndrome: Clinical, Cytogenetic, and Molecular Analysis of Thirteen Patients                                                                                                                       | 2003 | American Journal of Human Genetics           | 73  | 1027 | 1040 | T&A | Excluded | wrong topic        |
| <b>Van Campenhout S., Devriendt K., Breckpot J., Frijns J.-P., Peeters H., Van Buggenhout G., Van Esch H., Maes B., Swillen A.</b>                                                                                                                      | Microduplication 22q11.2: A description of the clinical, developmental and behavioral characteristics during childhood                                                                                                                   | 2012 | Genetic Counseling                           | 23  | 135  | 148  | T&A | Excluded | wrong topic        |
| <b>Caballero F., Fresán A., Palacios J.J., Rodríguez-Verdugo S.</b>                                                                                                                                                                                     | Minor physical anomalies and schizophrenia [Anomalías físicas menores y esquizofrenia]                                                                                                                                                   | 2007 | Salud Mental                                 | 30  | 12   | 19   | T&A | Excluded | wrong topic        |
| <b>Schulze B.R.B., Tariverdian G., Komposch G., Stellzig A.</b>                                                                                                                                                                                         | Misclassification risk of patients with bilateral cleft lip and palate and manifestations of median facial dysplasia: A new variant of Del(22q11.2) syndrome?                                                                            | 2001 | American Journal of Medical Genetics         | 99  | 280  | 285  | T&A | Excluded | wrong study design |
| <b>Kirchhoff M., Bisgaard A.-M., Bryndorf T., Gerdes T.</b>                                                                                                                                                                                             | MLPA analysis for a panel of syndromes with mental retardation reveals imbalances in 5.8% of patients with mental retardation and dysmorphic features, including duplications of the Sotos syndrome and Williams-Beuren syndrome regions | 2007 | European Journal of Medical Genetics         | 50  | 33   | 42   | T&A | Excluded | wrong topic        |
| <b>Meechan D.W., Maynard T.M., Tucker E.S., Fernandez A., Karpinski B.A., Rothblat L.A., LaMantia A.-S.</b>                                                                                                                                             | Modeling a model: Mouse genetics, 22q11.2 Deletion Syndrome, and disorders of cortical circuit development                                                                                                                               | 2015 | Progress in Neurobiology                     | 130 | 1    | 28   | T&A | Excluded | no human           |
| <b>Lindstrand A., Malmgren H., Verri A., Benetti E., Eriksson M., Nordgren A., Anderlid B.-M., Golovleva I., Schoumans J., Blennow E.</b>                                                                                                               | Molecular and clinical characterization of patients with overlapping 10p deletions                                                                                                                                                       | 2010 | American Journal of Medical Genetics, Part A | 152 | 1233 | 1243 | T&A | Excluded | wrong topic        |



|                                                                                                                                                                                            |                                                                                                                                                                                                                                                     |      |                                            |     |      |      |     |          |                    |
|--------------------------------------------------------------------------------------------------------------------------------------------------------------------------------------------|-----------------------------------------------------------------------------------------------------------------------------------------------------------------------------------------------------------------------------------------------------|------|--------------------------------------------|-----|------|------|-----|----------|--------------------|
| <b>Matsuoka R., Kimura M., Scambler P.J., Morrow B.E., Imamura S.-I., Minoshima S., Shimizu N., Yamagishi H., Joh-o K., Watanabe S., Oyama K., Saji T., Ando M., Takao A., Momma K.</b>    | Molecular and clinical study of 183 patients with conotruncal anomaly face syndrome                                                                                                                                                                 | 1998 | Human Genetics                             | 103 | 70   | 80   | FT  | Excluded | incomplete outcome |
| <b>Todorov T., Todorova A., Avdjieva D., Dimova P., Angelova L., Tincheva R., Mitev V.</b>                                                                                                 | Molecular basis of mental retardation in a sample from Bulgaria                                                                                                                                                                                     | 2010 | Genetic Counseling                         | 21  | 257  | 262  | T&A | Excluded | wrong topic        |
| <b>Koolen D.A., Reardon W., Rosser E.M., Lacombe D., Hurst J.A., Law C.J., Bongers E.M.H.F., Van Ravenswaaij-Arts C.M., Leisink M.A.R., Van Kessel A.G., Veltman J.A., De Vries B.B.A.</b> | Molecular characterisation of patients with subtelomeric 22q abnormalities using chromosome specific array-based comparative genomic hybridisation                                                                                                  | 2005 | European Journal of Human Genetics         | 13  | 1019 | 1024 | T&A | Excluded | wrong topic        |
| <b>Iascone M.R., Vittorini S., Sacchelli M., Spadoni I., Simi P., Giusti S.</b>                                                                                                            | Molecular characterization of 22q11 deletion in a three-generation family with maternal transmission                                                                                                                                                | 2002 | American Journal of Medical Genetics       | 108 | 319  | 321  | T&A | Excluded | wrong study design |
| <b>Vittorini S., Sacchelli M., Iascone M.R., Collavoli A., Storti S., Giusti A., Andreani G., Botto N., Biagini A., Clerico A.</b>                                                         | Molecular characterization of chromosome 22 deletions by short tandem repeat polymorphism (STRP) in patients with conotruncal heart defects                                                                                                         | 2001 | Clinical Chemistry and Laboratory Medicine | 39  | 1249 | 1258 | FT  | Excluded | incomplete outcome |
| <b>Torres L., Rosell J., Bernués M., Govea N., Gorreto L., García Algas F., De la Fuente Sánchez M.A., Heine Súñer D.</b>                                                                  | Molecular characterization of deletions and mutations of the 22q11 region in patients with congenital heart diseases [Caracterización molecular de deleciones y mutaciones de la región 22q11 en pacientes con <del>cardiopatías congénitas</del> ] | 2004 | Investigacion Cardiovascular               | 7   | 81   | 92   | T&A | Excluded | wrong outcome      |
| <b>Mears A.J., Duncan A.M.V., Budarf M.L., Emanuel B.S., Sellinger B., Siegel-Bartelt J., Greenberg C.R., McDermid H.E.</b>                                                                | Molecular characterization of the marker chromosome associated with cat eye syndrome                                                                                                                                                                | 1994 | American Journal of Human Genetics         | 55  | 134  | 142  | T&A | Excluded | wrong topic        |

|                                                                                                                                                                                                           |                                                                                                                      |      |                                                                                |     |      |      |     |          |                        |
|-----------------------------------------------------------------------------------------------------------------------------------------------------------------------------------------------------------|----------------------------------------------------------------------------------------------------------------------|------|--------------------------------------------------------------------------------|-----|------|------|-----|----------|------------------------|
| <b>Carlson C., Sirotkin H., Pandita R., Goldberg R., McKie J., Wadey R., Patanjali S.R., Weissman S.M., Anyane-Yeboah K., Warburton D., Scambler P., Shprintzen R., Kucherlapati R., Morrow B.E.</b>      | Molecular definition of 22q11 deletions in 151 velo-cardio-facial syndrome patients                                  | 1997 | American Journal of Human Genetics                                             | 61  | 620  | 629  | FT  | Excluded | incomplete outcome     |
| <b>Stachon A.C., Baskin B., Smith A.C., Shugar A., Cytrynbaum C., Fishman L., Mendoza-Londono R., Klatt R., Teebi A., Ray P.N., Weksberg R.</b>                                                           | Molecular diagnosis of 22q11.2 deletion and duplication by multiplex ligation dependent probe amplification          | 2007 | American Journal of Medical Genetics, Part A                                   | 143 | 2924 | 2930 | FT  | Excluded | incomplete outcome     |
| <b>Moore G.E.</b>                                                                                                                                                                                         | Molecular Genetic Approaches to the Study of Human Craniofacial Dysmorphologies                                      | 1995 | International Review of Cytology                                               | 158 | 215  | 277  | T&A | Excluded | wrong topic            |
| <b>Prescott K., Scambler P.J.</b>                                                                                                                                                                         | Molecular genetics of velo-cardio-facial syndrome                                                                    | 2005 | Velo-Cardio-Facial Syndrome: A Model for Understanding Microdeletion Disorders |     | 19   | 46   | T&A | Excluded | wrong publication type |
| <b>Spengler S., Begemann M., Ortiz Brüchele N., Baudis M., Denecke B., Kroisel P.M., Oehl-Jaschkowitz B., Schulze B., Raabe-Meyer G., Spaich C., Blümel P., Jauch A., Moog U., Zerres K., Eggemann T.</b> | Molecular karyotyping as a relevant diagnostic tool in children with growth retardation with silver-russell features | 2012 | Journal of Pediatrics                                                          | 161 | 933  | 9420 | T&A | Excluded | wrong topic            |
| <b>Barnett C.P., Van Bon B.W.M.</b>                                                                                                                                                                       | Monogenic and chromosomal causes of isolated speech and language impairment                                          | 2015 | Journal of Medical Genetics                                                    | 52  | 719  | 729  | T&A | Excluded | wrong topic            |
| <b>Mihailov A., Padula M.C., Scariati E., Schaer M., Schneider M., Eliez S.</b>                                                                                                                           | Morphological brain changes associated with negative symptoms in patients with 22q11.2 Deletion Syndrome             | 2017 | Schizophrenia Research                                                         | 188 | 52   | 58   | T&A | Excluded | wrong outcome          |
| <b>Dempsey M.A., Schwartz S., Waggoner D.J.</b>                                                                                                                                                           | Mosaicism del(22)(q11.2q11.2)/dup(22)(q11.2q11.2) in a patient with features of 22q11.2 deletion syndrome            | 2007 | American Journal of Medical Genetics, Part A                                   | 143 | 1082 | 1086 | T&A | Excluded | wrong topic            |
| <b>Van Der Weyden L., Bradley A.</b>                                                                                                                                                                      | Mouse chromosome engineering for modeling human disease                                                              | 2006 | Annual Review of Genomics and Human Genetics                                   | 7   | 247  | 276  | T&A | Excluded | no human               |

|                                                                                                                                                                                                                                                                                                                                                                           |                                                                                                                                      |      |                                  |     |      |      |     |          |               |
|---------------------------------------------------------------------------------------------------------------------------------------------------------------------------------------------------------------------------------------------------------------------------------------------------------------------------------------------------------------------------|--------------------------------------------------------------------------------------------------------------------------------------|------|----------------------------------|-----|------|------|-----|----------|---------------|
| <b>Geyer M.A., McIlwain K.L., Paylor R.</b>                                                                                                                                                                                                                                                                                                                               | Mouse genetic models for prepulse inhibition: An early review                                                                        | 2002 | Molecular Psychiatry             | 7   | 1039 | 1053 | T&A | Excluded | no human      |
| <b>Piret S.E., Thakker R.V.</b>                                                                                                                                                                                                                                                                                                                                           | Mouse models for inherited endocrine and metabolic disorders                                                                         | 2011 | Journal of Endocrinology         | 211 | 211  | 230  | T&A | Excluded | no human      |
| <b>O'Hanlon E., Howley S., Prasad S., McGrath J., Leemans A., McDonald C., Garavan H., Murphy K.C.</b>                                                                                                                                                                                                                                                                    | Multimodal MRI reveals structural connectivity differences in 22q11 deletion syndrome related to impaired spatial working memory     | 2016 | Human Brain Mapping              | 37  | 4689 | 4705 | T&A | Excluded | wrong outcome |
| <b>Dittwald P., Gambin T., Szatranski P., Li J., Amato S., Divon M.Y., Rojas -L.X.R., Elton L.E., Scott D.A., Schaaf C.P., Torres-Martinez W., Stevens A.K., Rosenfeld J.A., Agadi S., Francis D., Kang S.-H.L., Breman A., Lalani S.R., Bacino C.A., Bi W., Milosavljevic A., Beaudet A.L., Patel A., Shaw C.A., Lupski J.R., Gambin A., Cheung S.W., Stankiewicz P.</b> | NAHR-mediated copy-number variants in a clinical population: Mechanistic insights into both genomic disorders and Mendelizing traits | 2013 | Genome Research                  | 23  | 1395 | 1409 | T&A | Excluded | wrong topic   |
| <b>Schneider M., Van der Linden M., Menghetti S., Debbané M., Eliez S.</b>                                                                                                                                                                                                                                                                                                | Negative and paranoid symptoms are associated with negative performance beliefs and social cognition in 22q11.2 deletion syndrome    | 2017 | Early Intervention in Psychiatry | 11  | 156  | 164  | T&A | Excluded | wrong outcome |
| <b>Gul K.A., Øverland T., Osnes L., Baumbusch L.O., Pettersen R.D., Lima K., Abrahamsen T.G.</b>                                                                                                                                                                                                                                                                          | Neonatal Levels of T-cell Receptor Excision Circles (TREC) in Patients with 22q11.2 Deletion Syndrome and Later Disease Features     | 2015 | Journal of Clinical Immunology   | 35  | 408  | 415  | T&A | Excluded | wrong outcome |

|                                                                                                                                                                                                                                                                                                                                                                                                                                                                                                                                                                                                                                                                                                                                                                                                                                                                                                                                                                                                                                                                                                                                                                                                                 |                                                                                               |             |                                           |            |            |            |                |                 |                      |
|-----------------------------------------------------------------------------------------------------------------------------------------------------------------------------------------------------------------------------------------------------------------------------------------------------------------------------------------------------------------------------------------------------------------------------------------------------------------------------------------------------------------------------------------------------------------------------------------------------------------------------------------------------------------------------------------------------------------------------------------------------------------------------------------------------------------------------------------------------------------------------------------------------------------------------------------------------------------------------------------------------------------------------------------------------------------------------------------------------------------------------------------------------------------------------------------------------------------|-----------------------------------------------------------------------------------------------|-------------|-------------------------------------------|------------|------------|------------|----------------|-----------------|----------------------|
| <p><b>Demaerel W., Hestand M.S., Vergaelen E., Swillen A., López-Sánchez M., Pérez-Jurado L.A., McDonald-McGinn D.M., Zackai E., Emanuel B.S., Morrow B.E., Breckpot J., Devriendt K., Vermeesch J.R., Antshel K., Arango C., Armando M., Bassett A., Bearden C., Boot E., Bravo-Sanchez M., Breetvelt E., Busa T., Butcher N., Campbell L., Carmel M., Chow E., Crowley T.B., Cubells J., Cutler D., Demaerel W., Digilio M.C., Duijff S., Eliez S., Emanuel B., Epstein M., Evers R., Fernandez Garcia-Moya L., Fiksinski A., Fraguas D., Fremont W., Fritsch R., Garcia-Minaur S., Golden A., Gothelf D., Guo T., Gur R., Gur R., Heine-Suner D., Hestand M., Hooper S., Kates W., Kushan L., Laorden-Nieto A., Maeder J., Marino B., Marshall C., McCabe K., McDonald-McGinn D., Michaelovosky E., Morrow B., Moss E., Mulle J., Murphy D., Murphy K., Murphy C., Niarchou M., Ornstein C., Owen M., Philip N., Repetto G., Schneider M., Shashi V., Simon T., Swillen A., Tassone F., Unolt M., van Amelsvoort T., van den Bree M., Van Duijn E., Vergaelen E., Vermeesch J., Vicari S., Vingerhoets C., Vorstman J., Warren S., Weinberger R., Weisman O., Weizman A., Zackai E., Zhang Z., Zwick</b></p> | <p>Nested Inversion Polymorphisms Predispose Chromosome 22q11.2 to Meiotic Rearrangements</p> | <p>2017</p> | <p>American Journal of Human Genetics</p> | <p>101</p> | <p>616</p> | <p>622</p> | <p>T&amp;A</p> | <p>Excluded</p> | <p>wrong outcome</p> |
| <p><b>Bearden C.E., Glahn D.C., Lee A.D., Chiang M.-C., van Erp T.G.M., Cannon T.D., Reiss A.L., Toga A.W., Thompson P.M.</b></p>                                                                                                                                                                                                                                                                                                                                                                                                                                                                                                                                                                                                                                                                                                                                                                                                                                                                                                                                                                                                                                                                               | <p>Neural phenotypes of common and rare genetic variants</p>                                  | <p>2008</p> | <p>Biological Psychology</p>              | <p>79</p>  | <p>43</p>  | <p>57</p>  | <p>T&amp;A</p> | <p>Excluded</p> | <p>wrong topic</p>   |
| <p><b>Ellegood J., Markx S., Lerch J.P., Steadman P.E., Genç C., Provenzano F., Kushner S.A., Henkelman R.M., Karavorgou M., Gogos J.A.</b></p>                                                                                                                                                                                                                                                                                                                                                                                                                                                                                                                                                                                                                                                                                                                                                                                                                                                                                                                                                                                                                                                                 | <p>Neuroanatomical phenotypes in a mouse model of the 22q11.2 microdeletion</p>               | <p>2014</p> | <p>Molecular Psychiatry</p>               | <p>19</p>  | <p>99</p>  | <p>107</p> | <p>T&amp;A</p> | <p>Excluded</p> | <p>no human</p>      |

|                                                                                               |                                                                                                                                                                                     |      |                                         |    |      |      |     |          |                        |
|-----------------------------------------------------------------------------------------------|-------------------------------------------------------------------------------------------------------------------------------------------------------------------------------------|------|-----------------------------------------|----|------|------|-----|----------|------------------------|
| <b>Baker K., Chaddock C.A., Baldeweg T., Skuse D.</b>                                         | Neuroanatomy in adolescents and young adults with 22q11 Deletion Syndrome: Comparison to an IQ-matched group                                                                        | 2011 | NeuroImage                              | 55 | 491  | 499  | T&A | Excluded | wrong outcome          |
| <b>Demily C., Rossi M., Schneider M., Edery P., Leleu A., D'Amato T., Franck N., Eliez S.</b> | Neurocognitive and psychiatric management of the 22q11.2 deletion syndrome [Perspectives actuelles dans la microdélétion 22q11.2: Prise en charge du phénotype neurocomportemental] | 2015 | Encephale                               | 41 | 266  | 273  | T&A | Excluded | wrong study design     |
| <b>Chow E.W.C., Watson M., Young D.A., Bassett A.S.</b>                                       | Neurocognitive profile in 22q11 deletion syndrome and schizophrenia                                                                                                                 | 2006 | Schizophrenia Research                  | 87 | 270  | 278  | T&A | Excluded | wrong outcome          |
| <b>Gur R.E.</b>                                                                               | Neurodevelopmental genomic strategies in the study of the psychosis spectrum                                                                                                        | 2016 | Nebraska Symposium on Motivation        | 63 | 5    | 30   | T&A | Excluded | wrong publication type |
| <b>Martinez-Biarge M., Jowett V.C., Cowan F.M., Wusthoff C.J.</b>                             | Neurodevelopmental outcome in children with congenital heart disease                                                                                                                | 2013 | Seminars in Fetal and Neonatal Medicine | 18 | 279  | 285  | T&A | Excluded | wrong topic            |
| <b>Latal B.</b>                                                                               | Neurodevelopmental Outcomes of the Child with Congenital Heart Disease                                                                                                              | 2016 | Clinics in Perinatology                 | 43 | 173  | 185  | T&A | Excluded | wrong topic            |
| <b>Boot E., van Amelsvoort T.A.M.J.</b>                                                       | Neuroimaging correlates of 22q11.2 deletion syndrome: Implications for schizophrenia research                                                                                       | 2012 | Current Topics in Medicinal Chemistry   | 12 | 2303 | 2313 | T&A | Excluded | wrong study design     |
| <b>Muraki K., Tanigaki K.</b>                                                                 | Neuronal migration abnormalities and its possible implications for schizophrenia                                                                                                    | 2015 | Frontiers in Neuroscience               | 9  |      |      | T&A | Excluded | wrong topic            |
| <b>Kiehl T.R., Chow E.W.C., Mikulis D.J., George S.R., Bassett A.S.</b>                       | Neuropathologic features in adults with 22q11.2 deletion syndrome                                                                                                                   | 2009 | Cerebral Cortex                         | 19 | 153  | 164  | T&A | Excluded | wrong outcome          |
| <b>Zinkstok J., Van Amelsvoort T.</b>                                                         | Neuropsychological profile and neuroimaging in patients with 22q11.2 Deletion Syndrome: A review                                                                                    | 2005 | Child Neuropsychology                   | 11 | 21   | 37   | T&A | Excluded | wrong study design     |

|                                                                                                                                                                                                      |                                                                                                                                                                                                      |      |                                                |     |      |      |     |          |                    |
|------------------------------------------------------------------------------------------------------------------------------------------------------------------------------------------------------|------------------------------------------------------------------------------------------------------------------------------------------------------------------------------------------------------|------|------------------------------------------------|-----|------|------|-----|----------|--------------------|
| <b>Śmigiel R., Piotrowicz M., Łaczmńska I., Makowska I., Błońska A., Hoffmann K., Jakubowski L., Blin N., Sasiadek M.M.</b>                                                                          | New bacterial artificial chromosome and commercial FISH probes for the 22q11.2 region in patients with congenital heart defect and with phenotype resembling DiGeorge and velocardiofacial syndromes | 2007 | Advances in Clinical and Experimental Medicine | 16  | 717  | 723  | T&A | Excluded | not available      |
| <b>Wenger S.L., Boone L.Y., Cummins J.H., Del Vecchio M.A., Bay C.A., Hummel M., Mowery-Rushton P.A.</b>                                                                                             | Newborn infant with inherited ring and de novo interstitial deletion on homologous chromosome 22s                                                                                                    | 2000 | American Journal of Medical Genetics           | 91  | 351  | 354  | T&A | Excluded | wrong topic        |
| <b>Guipponi M., Santoni F., Schneider M., Gehrig C., Bustillo X.B., Kates W.R., Morrow B., Armando M., Vicari S., Sloan-Béna F., Gagnebin M., Shashi V., Hooper S.R., Eliez S., Antonarakis S.E.</b> | No evidence for the presence of genetic variants predisposing to psychotic disorders on the non-deleted 22q11.2 allele of VCFS patients                                                              | 2017 | Translational Psychiatry                       | 7   |      |      | T&A | Excluded | wrong outcome      |
| <b>Lepach A.C., Petermann F.</b>                                                                                                                                                                     | Nonverbal and verbal learning: A comparative study of children and adolescents with 22q11 deletion syndrome, non-syndromal Nonverbal Learning Disorder and memory disorder                           | 2011 | Neurocase                                      | 17  | 480  | 490  | T&A | Excluded | wrong outcome      |
| <b>Torti E.E., Braddock S.R., Bernreuter K., Batanian J.R.</b>                                                                                                                                       | Oculo-auriculo-vertebral spectrum, cat eye, and distal 22q11 microdeletion syndromes: A unique double rearrangement                                                                                  | 2013 | American Journal of Medical Genetics, Part A   | 161 | 1992 | 1998 | T&A | Excluded | wrong study design |
| <b>Sikora A.G., Lee K.C.</b>                                                                                                                                                                         | Otolaryngologic manifestations of immunodeficiency                                                                                                                                                   | 2003 | Otolaryngologic Clinics of North America       | 36  | 647  | 672  | T&A | Excluded | wrong topic        |
| <b>Moutin E., Nikonenko I., Stefanelli T., Wirth A., Ponimaskin E., De Roo M., Muller D.</b>                                                                                                         | Palmitoylation of cdc42 Promotes Spine Stabilization and Rescues Spine Density Deficit in a Mouse Model of 22q11.2 Deletion Syndrome                                                                 | 2017 | Cerebral Cortex                                | 27  | 3618 | 3629 | T&A | Excluded | no human           |

|                                                                                                                                                                                                                    |                                                                                                                                                                        |      |                                                      |     |     |     |     |          |               |
|--------------------------------------------------------------------------------------------------------------------------------------------------------------------------------------------------------------------|------------------------------------------------------------------------------------------------------------------------------------------------------------------------|------|------------------------------------------------------|-----|-----|-----|-----|----------|---------------|
| <b>Eliez S., Antonarakis S.E., Morris M.A., Dahoun S.P., Reiss A.L.</b>                                                                                                                                            | Parental origin of the deletion 22q11.2 and brain development in velocardiofacial syndrome: A preliminary study                                                        | 2001 | Archives of General Psychiatry                       | 58  | 64  | 68  | T&A | Excluded | wrong outcome |
| <b>Van Den Heuvel E., Manders E., Swillen A., Zink I.</b>                                                                                                                                                          | Parental report on socio-communicative behaviours in children with 22q11.2 deletion syndrome                                                                           | 2017 | Journal of Intellectual and Developmental Disability | 42  | 162 | 172 | T&A | Excluded | wrong outcome |
| <b>León L.E., Benavides F., Espinoza K., Vial C., Alvarez P., Palomares M., Lay-Son G., Miranda M., Repetto G.M.</b>                                                                                               | Partial microduplication in the histone acetyltransferase complex member KANSL1 is associated with congenital heart defects in 22q11.2 microdeletion syndrome patients | 2017 | Scientific Reports                                   | 7   |     |     | T&A | Excluded | wrong outcome |
| <b>Yi J.J., Weinberger R., Moore T.M., Calkins M.E., Guri Y., McDonald-McGinn D.M., Zackai E.H., Emanuel B.S., Gur R.E., Gothelf D., Gur R.C.</b>                                                                  | Performance on a computerized neurocognitive battery in 22q11.2 deletion syndrome: A comparison between US and Israeli cohorts                                         | 2016 | Brain and Cognition                                  | 106 | 33  | 41  | T&A | Excluded | wrong outcome |
| <b>Schell D.N., Winlaw D.S.</b>                                                                                                                                                                                    | Peri-operative management of paediatric patients undergoing cardiac surgery - focus on respiratory aspects of care                                                     | 2007 | Paediatric Respiratory Reviews                       | 8   | 336 | 347 | T&A | Excluded | wrong topic   |
| <b>Van Kogelenberg M., Ghedia S., McGillivray G., Bruno D., Leventer R., MacDermot K., Nelson J., Nagarajan L., Veltman J.A., De Brouwer A.P., McKinlay Gardner R.J., Van Bokhoven H., Kirk E.P., Robertson S.</b> | Periventricular heterotopia in common microdeletion syndromes                                                                                                          | 2010 | Molecular Syndromology                               | 1   | 35  | 41  | T&A | Excluded | wrong topic   |
| <b>Weischenfeldt J., Symmons O., Spitz F., Korbel J.O.</b>                                                                                                                                                         | Phenotypic impact of genomic structural variation: Insights from and for human disease                                                                                 | 2013 | Nature Reviews Genetics                              | 14  | 125 | 138 | T&A | Excluded | wrong topic   |
| <b>Cancrini C., Romiti M.L., Finocchi A., Di Cesare S., Ciaffi P., Capponi C., Pahwa S., Rossi P.</b>                                                                                                              | Post-natal ontogenesis of the T-cell receptor CD4 and CD8 V $\beta$ repertoire and immune function in children with DiGeorge syndrome                                  | 2005 | Journal of Clinical Immunology                       | 25  | 265 | 274 | T&A | Excluded | wrong outcome |

|                                                                                                                       |                                                                                                                                                                                 |      |                                                  |       |     |     |     |          |                    |
|-----------------------------------------------------------------------------------------------------------------------|---------------------------------------------------------------------------------------------------------------------------------------------------------------------------------|------|--------------------------------------------------|-------|-----|-----|-----|----------|--------------------|
| <b>Galindo A., Gutiérrez-Larraya F., Martínez J.M., Del Rio M., Grañeras A., Velasco J.M., Puerto B., Gratacos E.</b> | Prenatal diagnosis and outcome for fetuses with congenital absence of the pulmonary valve                                                                                       | 2006 | Ultrasound in Obstetrics and Gynecology          | 28    | 32  | 39  | T&A | Excluded | wrong topic        |
| <b>Razavi R.S., Sharland G.K., Simpson J.M.</b>                                                                       | Prenatal diagnosis by echocardiogram and outcome of absent pulmonary valve syndrome                                                                                             | 2003 | American Journal of Cardiology                   | 91    | 429 | 432 | T&A | Excluded | wrong topic        |
| <b>Driscoll D.A.</b>                                                                                                  | Prenatal diagnosis of the 22q11.2 deletion syndrome                                                                                                                             | 2001 | Genetics in Medicine                             | 3     | 14  | 18  | T&A | Excluded | wrong study design |
| <b>Hunter L.E., Simpson J.M.</b>                                                                                      | Prenatal screening for structural congenital heart disease                                                                                                                      | 2014 | Nature Reviews Cardiology                        | 11    | 323 | 334 | T&A | Excluded | wrong topic        |
| <b>Bonilla F.A.</b>                                                                                                   | Presenting phenotype in 100 children with the 22q11 deletion syndrome: Commentary                                                                                               | 2006 | Pediatrics                                       | 118   | S47 | S48 | FT  | Excluded | incomplete outcome |
| <b>Hoogendoorn M.L.C., Vorstman J.A.S., Jalali G.R., Selten J.-P., Sinke R.J., Emanuel B.S., Kahn R.S.</b>            | Prevalence of 22q11.2 deletions in 311 Dutch patients with schizophrenia                                                                                                        | 2008 | Schizophrenia Research                           | 98    | 84  | 88  | T&A | Excluded | wrong outcome      |
| <b>Zhang Y., Wang Z., Gemeinhart R.A.</b>                                                                             | Progress in microRNA delivery                                                                                                                                                   | 2013 | Journal of Controlled Release                    | 172   | 962 | 974 | T&A | Excluded | wrong topic        |
| <b>Favier R., Raslova H.</b>                                                                                          | Progress in understanding the diagnosis and molecular genetics of macrothrombocytopenias                                                                                        | 2015 | British Journal of Haematology                   | 170   | 626 | 639 | T&A | Excluded | wrong topic        |
| <b>Sugama S., Namihira T., Matsuoka R., Taira N., Eto Y., Maekawa K.</b>                                              | Psychiatric inpatients and chromosome deletions within 22q11.2                                                                                                                  | 1999 | Journal of Neurology Neurosurgery and Psychiatry | 67    | 803 | 806 | T&A | Excluded | wrong outcome      |
| <b>Jolin E.M., Weller R.A., Weller E.B.</b>                                                                           | Psychosis in children with velocardiofacial syndrome (22q11.2 deletion syndrome)                                                                                                | 2009 | Current Psychiatry Reports                       | 11    | 99  | 105 | T&A | Excluded | wrong outcome      |
| <b>Devriendt K., Swillen A., Stalmans I., Casteels I.</b>                                                             | Pulmonary atresia/ventricular septal defect associated with facial port-wine stain and retinal vascular abnormality: A new constellation or deletion in chromosome 22q11.2? [7] | 2005 | American Journal of Medical Genetics             | 132 A | 340 | 341 | T&A | Excluded | wrong topic        |



|                                                                                                                                                                                                                                                                                                                                                                                                                            |                                                                                                                                                         |      |                                                     |     |      |      |     |          |                    |
|----------------------------------------------------------------------------------------------------------------------------------------------------------------------------------------------------------------------------------------------------------------------------------------------------------------------------------------------------------------------------------------------------------------------------|---------------------------------------------------------------------------------------------------------------------------------------------------------|------|-----------------------------------------------------|-----|------|------|-----|----------|--------------------|
| <b>Chow E.W.C., Mikulis D.J., Zipursky R.B., Scutt L.E., Weksberg R., Bassett A.S.</b>                                                                                                                                                                                                                                                                                                                                     | Qualitative MRI findings in adults with 22q11 deletion syndrome and schizophrenia                                                                       | 1999 | Biological Psychiatry                               | 46  | 1436 | 1442 | T&A | Excluded | wrong outcome      |
| <b>Padula M.C., Schaer M., Scariati E., Mutlu A.K., Zöller D., Schneider M., Eliez S.</b>                                                                                                                                                                                                                                                                                                                                  | Quantifying indices of short- and long-range white matter connectivity at each cortical vertex                                                          | 2017 | PLoS ONE                                            | 12  | 1436 | 1442 | T&A | Excluded | wrong topic        |
| <b>Paronett E.M., Meechan D.W., Karpinski B.A., LaMantia A.-S., Maynard T.M.</b>                                                                                                                                                                                                                                                                                                                                           | Ranbp1, deleted in DiGeorge/22q11.2 deletion syndrome, is a microcephaly gene that selectively disrupts layer 2/3 cortical projection neuron generation | 2015 | Cerebral Cortex                                     | 25  | 3977 | 3993 | T&A | Excluded | wrong topic        |
| <b>Mlynarski E.E., Xie M., Taylor D., Sheridan M.B., Guo T., Racedo S.E., McDonald-McGinn D.M., Chow E.W.C., Vorstman J., Swillen A., Devriendt K., Breckpot J., Digilio M.C., Marino B., Dallapiccola B., Philip N., Simon T.J., Roberts A.E., Piotrowicz M., Bearden C.E., Eliez S., Gothelf D., Coleman K., Kates W.R., Devoto M., Zackai E., Heine-Suñer D., Goldmuntz E., Bassett A.S., Morrow B.F., Emanuel B.S.</b> | Rare copy number variants and congenital heart defects in the 22q11.2 deletion syndrome                                                                 | 2016 | Human Genetics                                      | 135 | 273  | 285  | FT  | Excluded | incomplete outcome |
| <b>Fulcoli F.G., Franzese M., Liu X., Zhang Z., Angelini C., Baldini A.</b>                                                                                                                                                                                                                                                                                                                                                | Rebalancing gene haploinsufficiency in vivo by targeting chromatin                                                                                      | 2016 | Nature Communications                               | 7   | 273  | 285  | T&A | Excluded | no human           |
| <b>Dauvé V., McLin V.A.</b>                                                                                                                                                                                                                                                                                                                                                                                                | Recent advances in the molecular and genetic understanding of congenital gastrointestinal malformations                                                 | 2013 | Journal of Pediatric Gastroenterology and Nutrition | 57  | 4    | 13   | T&A | Excluded | wrong topic        |

|                                                                                                                                                                                                                                                                                                                                                                                                                                                                                                                                                                                 |                                                                                                                         |      |                                         |     |      |      |     |          |                    |
|---------------------------------------------------------------------------------------------------------------------------------------------------------------------------------------------------------------------------------------------------------------------------------------------------------------------------------------------------------------------------------------------------------------------------------------------------------------------------------------------------------------------------------------------------------------------------------|-------------------------------------------------------------------------------------------------------------------------|------|-----------------------------------------|-----|------|------|-----|----------|--------------------|
| De Kovel C.G.F., Trucks H., Helbig I., Mefford H.C., Baker C., Leu C., Kluck C., Muhle H., Von Spiczak S., Ostertag P., Obermeier T., Kleefuß-Lie A.A., Hallmann K., Steffens M., Gaus V., Klein K.M., Hamer H.M., Rosenow F., Brilstra E.H., Kasteleijn-Nolst Trenité D., Swinkels M.E.M., Weber Y.G., Unterberger I., Zimprich F., Urak L., Feucht M., Fuchs K., Møller R.S., Hjalgrim H., De Jonghe P., Suls A., Rückert I.-M., Wichmann H.-E., Franke A., Schreiber S., Nürnberg P., Elger C.E., Lerche H., Stephani U., Koeleman B.P.C., Lindhout D., Eichler E.E., Sander | Recurrent microdeletions at 15q11.2 and 16p13.11 predispose to idiopathic generalized epilepsies                        | 2010 | Brain                                   | 133 | 23   | 32   | T&A | Excluded | wrong topic        |
| Bittel D.C., Yu S., Newkirk H., Kibiryeve N., Holt Iii A., Butler M.G., Cooley L.D.                                                                                                                                                                                                                                                                                                                                                                                                                                                                                             | Refining the 22q11.2 deletion breakpoints in DiGeorge syndrome by aCGH                                                  | 2009 | Cytogenetic and Genome Research         | 124 | 113  | 120  | FT  | Excluded | incomplete outcome |
| Bearden C.E., van Erp T.G.M., Monterosso J.R., Simon T.J., Glahn D.C., Saleh P.A., Hill N.M., McDonald-McGinn D.M., Zackai E., Emanuel B.S., Cannon T.D.                                                                                                                                                                                                                                                                                                                                                                                                                        | Regional brain abnormalities in 22q11.2 deletion syndrome: Association with cognitive abilities and behavioral symptoms | 2004 | Neurocase                               | 10  | 198  | 206  | T&A | Excluded | wrong outcome      |
| Schaer M., Glaser B., Ottet M.-C., Schneider M., Cuadra M.B., Debbané M., Thiran J.-P., Eliez S.                                                                                                                                                                                                                                                                                                                                                                                                                                                                                | Regional cortical volumes and congenital heart disease: A MRI study in 22q11.2 deletion syndrome                        | 2010 | Journal of Neurodevelopmental Disorders | 2   | 224  | 234  | T&A | Excluded | wrong outcome      |
| Kates W.R., Burnette C.P., Jabs E.W., Rutberg J., Murphy A.M., Grados M., Geraghty M., Kaufmann W.E., Pearlson G.D.                                                                                                                                                                                                                                                                                                                                                                                                                                                             | Regional cortical white matter reductions in velocardiofacial syndrome: A volumetric MRI analysis                       | 2001 | Biological Psychiatry                   | 49  | 677  | 684  | T&A | Excluded | wrong outcome      |
| Yoshida K., Kuo F., George E.L., Sharpe A.H., Dutta A.                                                                                                                                                                                                                                                                                                                                                                                                                                                                                                                          | Requirement of CDC45 for postimplantation mouse development                                                             | 2001 | Molecular and Cellular Biology          | 21  | 4598 | 4603 | T&A | Excluded | no human           |

|                                                                                                                                                                                                                                           |                                                                                                                                                          |      |                                                                                 |     |      |      |     |          |                        |
|-------------------------------------------------------------------------------------------------------------------------------------------------------------------------------------------------------------------------------------------|----------------------------------------------------------------------------------------------------------------------------------------------------------|------|---------------------------------------------------------------------------------|-----|------|------|-----|----------|------------------------|
| <b>Varga I., Plank L., Mešťanová V., Zábajníková L.</b>                                                                                                                                                                                   | Review and proposal for classification of the congenital anomalies of thymus in children [Prehľad a návrh klasifikácie vrodených anomálií týmusu u detí] | 2014 | Cesko-Slovenska Pediatrie                                                       | 69  | 178  | 190  | T&A | Excluded | wrong topic            |
| <b>Inman K.E., Ezin M., Bronner-Fraser M., Trainor P.A.</b>                                                                                                                                                                               | Role of Cardiac Neural Crest Cells in Morphogenesis of the Heart and Great Vessels                                                                       | 2010 | Heart Development and Regeneration                                              | 69  | 417  | 439  | T&A | Excluded | wrong publication type |
| <b>Mohanty V., Gökmen-Polar Y., Badve S., Janga S.C.</b>                                                                                                                                                                                  | Role of lncRNAs in health and disease-size and shape matter                                                                                              | 2015 | Briefings in Functional Genomics                                                | 14  | 115  | 129  | T&A | Excluded | wrong topic            |
| <b>Tian J., An X., Niu L.</b>                                                                                                                                                                                                             | Role of microRNAs in cardiac development and disease (Review)                                                                                            | 2017 | Experimental and Therapeutic Medicine                                           | 13  | 3    | 8    | T&A | Excluded | wrong topic            |
| <b>Bassett A.S., Chow E.W.C.</b>                                                                                                                                                                                                          | Schizophrenia and 22q11.2 deletion syndrome                                                                                                              | 2008 | Current Psychiatry Reports                                                      | 10  | 148  | 157  | T&A | Excluded | wrong study design     |
| <b>Murphy K.C.</b>                                                                                                                                                                                                                        | Schizophrenia and velo-cardio-facial syndrome                                                                                                            | 2002 | Lancet                                                                          | 359 | 426  | 430  | T&A | Excluded | wrong study design     |
| <b>Karayorgou M., Morris M.A., Morrow B., Shprintzen R.J., Goldberg R., Borrow J., Gos A., Nestadt G., Wolyniec P.S., Lasseter V.K., Eisen H., Childs B., Kazazian H.H., Kucherlapati R., Antonarakis S.E., Pulver A.E., Housman D.E.</b> | Schizophrenia susceptibility associated with interstitial deletions of chromosome 22q11                                                                  | 1995 | Proceedings of the National Academy of Sciences of the United States of America | 92  | 7612 | 7616 | T&A | Excluded | wrong outcome          |
| <b>Williams H.J., Monks S., Murphy K.C., Kirov G., O'Donovan M.C., Owen M.J.</b>                                                                                                                                                          | Schizophrenia two-hit hypothesis in velo-cardio facial syndrome                                                                                          | 2013 | American Journal of Medical Genetics, Part B: Neuropsychiatric Genetics         | 162 | 177  | 182  | T&A | Excluded | wrong outcome          |
| <b>Pretto D., Maar D., Yrigollen C.M., Regan J., Tassone F.</b>                                                                                                                                                                           | Screening newborn blood spots for 22q11.2 deletion syndrome using multiplex droplet digital PCR                                                          | 2015 | Clinical Chemistry                                                              | 61  | 182  | 190  | T&A | Excluded | wrong outcome          |
| <b>Jurewicz I., Owen R.J., O'Donovan M.C., Owen M.J.</b>                                                                                                                                                                                  | Searching for susceptibility genes in schizophrenia                                                                                                      | 2001 | European Neuropsychopharmacology                                                | 11  | 395  | 398  | T&A | Excluded | wrong topic            |

|                                                                                                         |                                                                                                                          |      |                                                                   |      |     |     |     |          |                        |
|---------------------------------------------------------------------------------------------------------|--------------------------------------------------------------------------------------------------------------------------|------|-------------------------------------------------------------------|------|-----|-----|-----|----------|------------------------|
| <b>Zemble R., Luning Prak E., McDonald K., McDonald-McGinn D., Zackai E., Sullivan K.</b>               | Secondary immunologic consequences in chromosome 22q11.2 deletion syndrome (DiGeorge syndrome/velocardiofacial syndrome) | 2010 | Clinical Immunology                                               | 136  | 409 | 418 | T&A | Excluded | wrong outcome          |
| <b>Antshel K.M., Abdulsabur N., Roizen N., Fremont W., Kates W.R.</b>                                   | Sex differences in cognitive functioning in velocardiofacial syndrome (VCFS)                                             | 2005 | Developmental Neuropsychology                                     | 28   | 849 | 869 | T&A | Excluded | wrong outcome          |
| <b>Wang Q., Charisi A., Latecki L.J., Gee J., Megalooikonomou V.</b>                                    | Shape similarity analysis of regions of interest in medical images                                                       | 2010 | Progress in Biomedical Optics and Imaging - Proceedings of SPIE   | 7624 | 849 | 869 | T&A | Excluded | wrong topic            |
| <b>Heike C.L., Starr J.R., Rieder M.J., Cunningham M.L., Edwards K.L., Stanaway I.B., Crawford D.C.</b> | Single nucleotide polymorphism discovery in TBX1 in individuals with and without 22q11.2 deletion syndrome               | 2010 | Birth Defects Research Part A - Clinical and Molecular Teratology | 88   | 54  | 63  | T&A | Excluded | wrong outcome          |
| <b>Pierpont J.W., Erickson R.P., Thompson F.H., Yang J.-M.</b>                                          | Size of 22q deletions in four previously reported patients with conotruncal anomaly face syndrome                        | 1996 | Clinical Genetics                                                 | 50   | 545 | 547 | FT  | Excluded | incomplete outcome     |
| <b>Heike C.L., Avellino A.M., Mirza S.K., Kifle Y., Perkins J., Sze R., Egbert M., Hing A.V.</b>        | Sleep disturbances in 22q11.2 deletion syndrome: A case with obstructive and central sleep apnea                         | 2007 | Cleft Palate-Craniofacial Journal                                 | 44   | 340 | 346 | T&A | Excluded | wrong study design     |
| <b>Lüerßen K., Pruggmayer M., Ptok M.</b>                                                               | Small deletion - Large effect [Kleine Deletion - Große Auswirkung]                                                       | 2004 | HNO                                                               | 52   | 258 | 260 | T&A | Excluded | wrong study design     |
| <b>Halder A., Jain M., Kalsi A.K.</b>                                                                   | SNP Microarray in FISH Negative Clinically Suspected 22q11.2 Microdeletion Syndrome                                      | 2016 | Scientifica                                                       | 2016 |     |     | T&A | Excluded | wrong outcome          |
| <b>Niccols A., Thomas K., Schmidt L.A.</b>                                                              | Socioemotional and Brain Development in Children with Genetic Syndromes Associated with Developmental Delay              | 2012 | The Oxford Handbook of Intellectual Disability and Development    |      |     |     | T&A | Excluded | wrong publication type |

|                                                                                                                                    |                                                                                                                                                             |      |                                  |     |      |      |     |          |                    |
|------------------------------------------------------------------------------------------------------------------------------------|-------------------------------------------------------------------------------------------------------------------------------------------------------------|------|----------------------------------|-----|------|------|-----|----------|--------------------|
| <b>Bish J.P., Pendyal A., Ding L., Ferrante H., Nguyen V., McDonald-McGinn D., Zackai E., Simon T.J.</b>                           | Specific cerebellar reductions in children with chromosome 22q11.2 deletion syndrome                                                                        | 2006 | Neuroscience Letters             | 399 | 245  | 248  | T&A | Excluded | wrong outcome      |
| <b>Rakonjac M., Cuturilo G., Stevanovic M., Jovanovic I., Dobrijevic L.J., Mijovic M., Drakulic D.</b>                             | Speech and language abilities of children with the familial form of 22Q11.2 deletion syndrome                                                               | 2016 | Genetika                         | 48  | 57   | 72   | FT  | Excluded | incomplete outcome |
| <b>Brandão G.R., De Souza Freitas J.A., Genaro K.F., Yamashita R.P., Fukushiro A.P., Lauris J.R.P.</b>                             | Speech outcomes and velopharyngeal function after surgical treatment of velopharyngeal insufficiency in individuals with signs of velocardiofacial syndrome | 2011 | Journal of Craniofacial Surgery  | 22  | 1736 | 1742 | T&A | Excluded | wrong outcome      |
| <b>Jalbrzikowski M., Jonas R., Senturk D., Patel A., Chow C., Green M.F., Bearden C.E.</b>                                         | Structural abnormalities in cortical volume, thickness, and surface area in 22q11.2 microdeletion syndrome: Relationship with psychotic symptoms            | 2013 | NeuroImage: Clinical             | 3   | 405  | 415  | T&A | Excluded | wrong outcome      |
| <b>Baylis A.L., Watson P.J., Moller K.T.</b>                                                                                       | Structural and functional causes of hypernasality in velocardiofacial syndrome                                                                              | 2009 | Folia Phoniatrica et Logopaedica | 61  | 93   | 96   | T&A | Excluded | wrong outcome      |
| <b>Van Amelsvoort T., Daly E., Robertson D., Suckling J., Ng V., Critchley H., Owen M.J., Henry J., Murphy K.C., Murphy D.G.M.</b> | Structural brain abnormalities associated with deletion at chromosome 22q11: Quantitative neuroimaging study of adults with velo-cardio-facial syndrome     | 2001 | British Journal of Psychiatry    | 178 | 412  | 419  | T&A | Excluded | wrong outcome      |
| <b>Chow E.W.C., Zipursky R.B., Mikulis D.J., Bassett A.S.</b>                                                                      | Structural brain abnormalities in patients with schizophrenia and 22q11 Deletion Syndrome                                                                   | 2002 | Biological Psychiatry            | 51  | 208  | 215  | T&A | Excluded | wrong outcome      |
| <b>Glaser B., Schaer M., Berney S., Debbane M., Vuilleumier P., Eliez S.</b>                                                       | Structural changes to the fusiform gyrus: A cerebral marker for social impairments in 22q11.2 deletion syndrome?                                            | 2007 | Schizophrenia Research           | 96  | 82   | 86   | T&A | Excluded | wrong outcome      |

|                                                                                                                                                                                            |                                                                                                                                     |      |                                                               |       |      |      |     |          |                    |
|--------------------------------------------------------------------------------------------------------------------------------------------------------------------------------------------|-------------------------------------------------------------------------------------------------------------------------------------|------|---------------------------------------------------------------|-------|------|------|-----|----------|--------------------|
| <b>Lorain S., Demczuk S., Lamour V., Toth S., Aurias A., Roe B.A., Lipinski M.</b>                                                                                                         | Structural organization of the WD repeat protein-encoding gene HIRA in the DiGeorge syndrome critical region of human chromosome 22 | 1996 | Genome Research                                               | 6     | 43   | 50   | T&A | Excluded | no human           |
| <b>Novelli G., Mari A., Amati F., Colosimo A., Sangiuolo F., Bengala M., Conti E., Ratti A., Bordoni R., Pizzuti A., Baldini A., Crinelli R., Pandolfi F., Magnani M., Dallapiccola B.</b> | Structure and expression of the human ubiquitin fusion - Degradation gene (UFD1L)                                                   | 1998 | Biochimica et Biophysica Acta - Gene Structure and Expression | 1396  | 158  | 162  | T&A | Excluded | wrong topic        |
| <b>Yushkevich P.A., Zhang H., Simon T.J., Gee J.C.</b>                                                                                                                                     | Structure-specific statistical mapping of white matter tracts                                                                       | 2009 | Mathematics and Visualization                                 |       | 83   | 112  | T&A | Excluded | wrong topic        |
| <b>Lindsay E.A., Greenberg F., Shaffer L.G., Shapira S.K., Scambler P.J., Baldini A.</b>                                                                                                   | Submicroscopic deletions at 22q11.2: Variability of the clinical picture and delineation of a commonly deleted region               | 1995 | American Journal of Medical Genetics                          | 56    | 191  | 197  | FT  | Excluded | incomplete outcome |
| <b>Sinderberry B., Brown S., Hammond P., Stevens A.F., Schall U., Murphy D.G.M., Murphy K.C., Campbell L.E.</b>                                                                            | Subtypes in 22q11.2 deletion syndrome associated with behaviour and neurofacial morphology                                          | 2013 | Research in Developmental Disabilities                        | 34    | 116  | 125  | T&A | Excluded | wrong outcome      |
| <b>Milczuk H.A., Smith D.S., Brockman J.H.</b>                                                                                                                                             | Surgical outcomes for velopharyngeal insufficiency in velocardiofacial syndrome and nonsyndromic patients                           | 2007 | Cleft Palate-Craniofacial Journal                             | 44    | 412  | 417  | T&A | Excluded | wrong outcome      |
| <b>Crabtree G., Gogos J.A.</b>                                                                                                                                                             | Synaptic plasticity, neural circuits and the emerging role of altered short-term information processing in schizophrenia            | 2014 | Frontiers in Synaptic Neuroscience                            | 6     | 412  | 417  | T&A | Excluded | wrong topic        |
| <b>Habel A., Mcginn M.-J., Zackai E.H., Unanue N., Mcdonald-Mcginn D.M.</b>                                                                                                                | Syndrome-specific growth charts for 22q11.2 deletion syndrome in Caucasian children                                                 | 2012 | American Journal of Medical Genetics, Part A                  | 158 A | 2665 | 2671 | T&A | Excluded | wrong outcome      |
| <b>Pierdominici M., Marziali M., Giovannetti A., Oliva A., Rosso R., Marino B., Digilio M.C., Giannotti A., Novelli G., Dallapiccola B., Aiuti F., Pandolfi F.</b>                         | T cell receptor repertoire and function in patients with DiGeorge syndrome and velocardiofacial syndrome                            | 2000 | Clinical and Experimental Immunology                          | 121   | 127  | 132  | T&A | Excluded | wrong outcome      |

|                                                                                                                                                                                      |                                                                                                                |      |                                                                         |     |      |      |     |          |                    |
|--------------------------------------------------------------------------------------------------------------------------------------------------------------------------------------|----------------------------------------------------------------------------------------------------------------|------|-------------------------------------------------------------------------|-----|------|------|-----|----------|--------------------|
| <b>Douglas N.C., Washkowitz A.J., Naiche L.A., Papaioannou V.E.</b>                                                                                                                  | T-Box Genes and Developmental Anomalies                                                                        | 2014 | Principles of Developmental Genetics: Second Edition                    |     | 635  | 652  | T&A | Excluded | wrong topic        |
| <b>Piliero L.M., Sanford A.N., McDonald-McGinn D.M., Zackai E.H., Sullivan K.E.</b>                                                                                                  | T-cell homeostasis in humans with thymic hypoplasia due to chromosome 22q11.2 deletion syndrome                | 2004 | Blood                                                                   | 103 | 1020 | 1025 | T&A | Excluded | wrong outcome      |
| <b>Cao H., Florez S., Amen M., Huynh T., Skobe Z., Baldini A., Amendt B.A.</b>                                                                                                       | Tbx1 regulates progenitor cell proliferation in the dental epithelium by modulating Pitx2 activation of p21    | 2010 | Developmental Biology                                                   | 347 | 289  | 300  | T&A | Excluded | no human           |
| <b>Dastjerdi A., Robson L., Walker R., Hadley J., Zhang Z., Rodriguez-Niedenführ M., Ataliotis P., Baldini A., Scambler P., Francis-West P.</b>                                      | Tbx1 regulation of myogenic differentiation in the limb and cranial mesoderm                                   | 2007 | Developmental Dynamics                                                  | 236 | 353  | 363  | T&A | Excluded | no human           |
| <b>Kates W.R., Miller A.M., AbdulSabur N., Antshel K.M., Conchelos J., Fremont W., Roizen N.</b>                                                                                     | Temporal lobe anatomy and psychiatric symptoms in velocardiofacial syndrome (22q11.2 deletion syndrome)        | 2006 | Journal of the American Academy of Child and Adolescent Psychiatry      | 45  | 587  | 595  | T&A | Excluded | wrong outcome      |
| <b>Bish J.P., Nguyen V., Ding L., Ferrante S., Simon T.J.</b>                                                                                                                        | Thalamic reductions in children with chromosome 22q11.2 deletion syndrome                                      | 2004 | NeuroReport                                                             | 15  | 1413 | 1415 | T&A | Excluded | wrong outcome      |
| <b>Fagman H., Liao J., Westerlund J., Andersson L., Morrow B.E., Nilsson M.</b>                                                                                                      | The 22q11 deletion syndrome candidate gene Tbx1 determines thyroid size and positioning                        | 2007 | Human Molecular Genetics                                                | 16  | 276  | 285  | T&A | Excluded | no human           |
| <b>Papangeli I., Scambler P.</b>                                                                                                                                                     | The 22q11 deletion: DiGeorge and velocardiofacial syndromes and the role of TBX1                               | 2013 | Wiley Interdisciplinary Reviews: Developmental Biology                  | 2   | 393  | 403  | T&A | Excluded | wrong study design |
| <b>Richard A.C., Rovelet-Lecrux A., Delaby E., Charbonnier C., Thiruvahindrapuram B., Hatchwell E., Eis P.S., Afenjar A., Dussardier B.G., Scherer S.W., Betancur C., Campion D.</b> | The 22q11 PRODH/DGCR6 deletion is frequent in hyperprolinemic subjects but is not a strong risk factor for ASD | 2016 | American Journal of Medical Genetics, Part B: Neuropsychiatric Genetics | 171 | 377  | 382  | T&A | Excluded | wrong outcome      |

|                                                                                                                                          |                                                                                                                                                  |      |                                                                    |     |     |     |     |          |                    |
|------------------------------------------------------------------------------------------------------------------------------------------|--------------------------------------------------------------------------------------------------------------------------------------------------|------|--------------------------------------------------------------------|-----|-----|-----|-----|----------|--------------------|
| <b>Jonas R.K., Montojo C.A., Bearden C.E.</b>                                                                                            | The 22q11.2 deletion syndrome as a window into complex neuropsychiatric disorders over the lifespan                                              | 2014 | Biological Psychiatry                                              | 75  | 351 | 360 | T&A | Excluded | wrong study design |
| <b>Lambert M.P., Arulsevan A., Schott A., Markham S.J., Crowley T.B., Zackai E.H., Mcdonald-Mcginn D.M.</b>                              | The 22q11.2 deletion syndrome: Cancer predisposition, platelet abnormalities and cytopenias                                                      | 2017 | American Journal of Medical Genetics, Part A                       |     |     |     | T&A | Excluded | wrong study design |
| <b>Drew L.J., Crabtree G.W., Markx S., Stark K.L., Chaverneff F., Xu B., Mukai J., Fenelon K., Hsu P.-K., Gogos J.A., Karayiorgou M.</b> | The 22q11.2 microdeletion: Fifteen years of insights into the genetic and neural complexity of psychiatric disorders                             | 2011 | International Journal of Developmental Neuroscience                | 29  | 259 | 281 | T&A | Excluded | wrong study design |
| <b>Van Der Bom T., Zomer A.C., Zwinderman A.H., Meijboom F.J., Bouma B.J., Mulder B.J.M.</b>                                             | The changing epidemiology of congenital heart disease                                                                                            | 2011 | Nature Reviews Cardiology                                          | 8   | 50  | 60  | T&A | Excluded | wrong topic        |
| <b>Gothelf B., Furfaro J.A., Penniman L.C., Glover G.H., Reiss A.L.</b>                                                                  | The contribution of novel brain imaging techniques to understanding the neurobiology of mental retardation and developmental disabilities        | 2005 | Mental Retardation and Developmental Disabilities Research Reviews | 11  | 331 | 339 | T&A | Excluded | wrong topic        |
| <b>Fletcher A.L., Calder A., Hince M.N., Boyd R.L., Chidgey A.P.</b>                                                                     | The contribution of thymic stromal abnormalities to autoimmune disease                                                                           | 2011 | Critical Reviews in Immunology                                     | 31  | 171 | 187 | T&A | Excluded | wrong topic        |
| <b>Muldoon M., Ousley O.Y., Kobrynski L.J., Patel S., Oster M.E., Fernandez-Carriba S., Cubells J.F., Coleman K., Pearce B.D.</b>        | The effect of hypocalcemia in early childhood on autism-related social and communication skills in patients with 22q11 deletion syndrome         | 2015 | European Archives of Psychiatry and Clinical Neuroscience          | 265 | 519 | 524 | T&A | Excluded | wrong outcome      |
| <b>Crespi B., Badcock C.</b>                                                                                                             | The evolutionary social brain: From genes to psychiatric conditions                                                                              | 2008 | Behavioral and Brain Sciences                                      | 31  | 284 | 296 | T&A | Excluded | wrong topic        |
| <b>Deak K.L., Horn S.R., Rehder C.W.</b>                                                                                                 | The evolving picture of microdeletion/microduplication syndromes in the age of microarray analysis: Variable expressivity and genomic complexity | 2011 | Clinics in Laboratory Medicine                                     | 31  | 543 | 564 | T&A | Excluded | wrong topic        |



|                                                                                                                               |                                                                                                                                                                                   |      |                                                                                                       |     |      |      |     |          |               |
|-------------------------------------------------------------------------------------------------------------------------------|-----------------------------------------------------------------------------------------------------------------------------------------------------------------------------------|------|-------------------------------------------------------------------------------------------------------|-----|------|------|-----|----------|---------------|
| <b>Green T., Steingart L., Frisch A., Zarchi O., Weizman A., Gothelf D.</b>                                                   | The feasibility and safety of S-adenosyl-L-methionine (SAME) for the treatment of neuropsychiatric symptoms in 22q11.2 deletion syndrome: A double-blind placebo-controlled trial | 2012 | Journal of Neural Transmission                                                                        | 119 | 1417 | 1423 | T&A | Excluded | wrong outcome |
| <b>Scott J.A., Goodrich-Hunsaker N., Kalish K., Lee A., Hunsaker M.R., Schumann C.M., Carmichael O.T., Simon T.J.</b>         | The hippocampi of children with chromosome 22q11.2 deletion syndrome have localized anterior alterations that predict severity of anxiety                                         | 2016 | Journal of Psychiatry and Neuroscience                                                                | 41  | 203  | 213  | T&A | Excluded | wrong outcome |
| <b>Badcock C.</b>                                                                                                             | The imprinted brain: How genes set the balance between autism and psychosis                                                                                                       | 2011 | Epigenomics                                                                                           | 3   | 345  | 359  | T&A | Excluded | wrong topic   |
| <b>Li-Ling J.</b>                                                                                                             | The Jing-Mai connections of the Heart                                                                                                                                             | 2003 | International Journal of Cardiology                                                                   | 89  | 1    | 11   | T&A | Excluded | wrong topic   |
| <b>Mølsted K., Boers M., Kjær I.</b>                                                                                          | The morphology of the sella turcica in velocardiofacial syndrome suggests involvement of a neural crest developmental field                                                       | 2010 | American Journal of Medical Genetics, Part A                                                          | 152 | 1450 | 1457 | T&A | Excluded | wrong outcome |
| <b>Ten Donkelaar H.J., Vermeij-Keers C., Mathijssen I.M.J.</b>                                                                | The neural crest and craniofacial malformations                                                                                                                                   | 2014 | Clinical Neuroembryology: Development and Developmental Disorders of the Human Central Nervous System |     | 219  | 269  | T&A | Excluded | wrong topic   |
| <b>Keyte A., Hutson M.R.</b>                                                                                                  | The neural crest in cardiac congenital anomalies                                                                                                                                  | 2012 | Differentiation                                                                                       | 84  | 25   | 40   | T&A | Excluded | wrong topic   |
| <b>Mikhail F.M., Burnside R.D., Rush B., Ibrahim J., Godshalk R., Rutledge S.L., Robin N.H., Descartes M.D., Carroll A.J.</b> | The recurrent distal 22q11.2 microdeletions are often de novo and do not represent a single clinical entity: A proposed categorization system                                     | 2014 | Genetics in Medicine                                                                                  | 16  | 92   | 100  | T&A | Excluded | wrong topic   |

|                                                                                                                                                                                                                            |                                                                                                                                                                                 |      |                                                        |     |      |      |     |          |                    |
|----------------------------------------------------------------------------------------------------------------------------------------------------------------------------------------------------------------------------|---------------------------------------------------------------------------------------------------------------------------------------------------------------------------------|------|--------------------------------------------------------|-----|------|------|-----|----------|--------------------|
| <b>Evers L.J.M., Engelen J.J.M., Houben L.M.H., Curfs L.M.G., van Amelsvoort T.A.M.J.</b>                                                                                                                                  | The use of two different MLPA kits in 22q11.2 deletion syndrome                                                                                                                 | 2016 | European Journal of Medical Genetics                   | 59  | 183  | 188  | FT  | Excluded | incomplete outcome |
| <b>Lin A.E.</b>                                                                                                                                                                                                            | The value of aortic valve and aortic arch imaging in the identification of genetic syndromes                                                                                    | 1996 | Echocardiography                                       | 13  | 447  | 457  | T&A | Excluded | wrong topic        |
| <b>Vantrappen G., Rommel N., Cremers C.W.R.J., Devriendt K., Frijns J.P.</b>                                                                                                                                               | The velo-cardio-facial syndrome: The otorhinolaryngeal manifestations and implications                                                                                          | 1998 | International Journal of Pediatric Otorhinolaryngology | 45  | 133  | 141  | T&A | Excluded | wrong study design |
| <b>Veneri D., Franchini M., Randon F., Nichele I., Pizzolo G., Ambrosetti A.</b>                                                                                                                                           | Thrombocytopenias: A clinical point of view                                                                                                                                     | 2009 | Blood Transfusion                                      | 7   | 75   | 85   | T&A | Excluded | wrong topic        |
| <b>Karl K., Heling K.-S., Sarut Lopez A., Thiel G., Chaoui R.</b>                                                                                                                                                          | Thymic-thoracic ratio in fetuses with trisomy 21, 18 or 13                                                                                                                      | 2012 | Ultrasound in Obstetrics and Gynecology                | 40  | 412  | 417  | T&A | Excluded | wrong topic        |
| <b>Markert M.L., Sarzotti M., Ozaki D.A., Sempowski G.D., Rhein M.E., Hale L.P., Le Deist F., Alexieff M.J., Li J., Hauser E.R., Haynes B.F., Rice H.E., Skinner M.A., Mahaffey S.M., Jagers J., Stein L.D., Mill M.B.</b> | Thymus transplantation in complete DiGeorge syndrome: Immunologic and safety evaluations in 12 patients                                                                         | 2003 | Blood                                                  | 102 | 1121 | 1130 | T&A | Excluded | wrong outcome      |
| <b>Stagi S., Lapi E., Gambineri E., Salti R., Genuardi M., Colarusso G., Conti C., Jenuso R., Chiarelli F., Azzari C., De Martino M.</b>                                                                                   | Thyroid function and morphology in subjects with microdeletion of chromosome 22q11 (del(22)(q11))                                                                               | 2010 | Clinical Endocrinology                                 | 72  | 839  | 844  | T&A | Excluded | wrong outcome      |
| <b>Gabriel Mounir D., Debbané M., Schaer M., Glaser B., Eliez S.</b>                                                                                                                                                       | Time processing in the velo-cardio-facial syndrome (22q11) and its link with the caudate nucleus [Noyau caudé et traitement temporel dans le syndrome vélocardiofacial (22q11)] | 2011 | Encephale                                              | 37  | S42  | S49  | T&A | Excluded | wrong outcome      |
| <b>Marino B., Digilio M.C., Novelli G., Giannotti A., Dallapiccola B.</b>                                                                                                                                                  | Tricuspid atresia and 22q11 deletion                                                                                                                                            | 1997 | American Journal of Medical Genetics                   | 72  | 40   | 42   | T&A | Excluded | wrong outcome      |
| <b>Dennis E.L., Thompson P.M.</b>                                                                                                                                                                                          | Typical and atypical brain development: A review of neuroimaging studies                                                                                                        | 2013 | Dialogues in Clinical Neuroscience                     | 15  | 359  | 384  | T&A | Excluded | wrong topic        |

|                                                                                                                               |                                                                                                                                                 |      |                                                          |       |      |      |     |          |                    |
|-------------------------------------------------------------------------------------------------------------------------------|-------------------------------------------------------------------------------------------------------------------------------------------------|------|----------------------------------------------------------|-------|------|------|-----|----------|--------------------|
| <b>Sandrin-Garcia P., Abramides D.V.M., Martelli L.R., Ramos E.S., Richieri-Costa A., Passos G.A.S.</b>                       | Typical phenotypic spectrum of velocardiofacial syndrome occurs independently of deletion size in chromosome 22q11.2                            | 2007 | Molecular and Cellular Biochemistry                      | 303   | 9    | 17   | FT  | Excluded | incomplete outcome |
| <b>Yang C., Huang C.-H., Cheong M.-L., Hung K.-L., Lin L.-H., Yu Y.-S., Chien C.-C., Huang H.-C., Chen C.-W., Huang C.-J.</b> | Unambiguous molecular detections with multiple genetic approach for the complicated chromosome 22q11 deletion syndrome                          | 2009 | BMC Medical Genetics                                     | 10    |      |      | FT  | Excluded | incomplete outcome |
| <b>Zrnová E., Vranová V., Šoukalová J., Slámová I., Vilémová M., Gaillyová R., Kuglík P.</b>                                  | Unique combination of 22q11 and 14qter microdeletion syndromes detected using oligonucleotide array-CGH                                         | 2012 | Molecular Syndromology                                   | 2     | 88   | 93   | T&A | Excluded | wrong study design |
| <b>Jackowski A.P., Laureano M.R., Del'Aquilla M.A., de Moura L.M., Assunção I., Silva I., Schwartzman J.S.</b>                | Update on Clinical Features and Brain Abnormalities in Neurogenetics Syndromes                                                                  | 2011 | Journal of Applied Research in Intellectual Disabilities | 24    | 217  | 236  | T&A | Excluded | wrong topic        |
| <b>Chegar B.E., Tatum III S.A., Marrinan E., Shprintzen R.J.</b>                                                              | Upper airway asymmetry in velo-cardio-facial syndrome                                                                                           | 2006 | International Journal of Pediatric Otorhinolaryngology   | 70    | 1375 | 1381 | T&A | Excluded | wrong outcome      |
| <b>Bejjani B.A., Saleki R., Ballif B.C., Rorem E.A., Sundin K., Theisen A., Kashork C.D., Shaffer L.G.</b>                    | Use of targeted array-based CGH for the clinical diagnosis of chromosomal imbalance: Is less more?                                              | 2005 | American Journal of Medical Genetics                     | 134 A | 259  | 267  | T&A | Excluded | wrong topic        |
| <b>Solomon B.D.</b>                                                                                                           | VACTERL/VATER association                                                                                                                       | 2011 | Orphanet Journal of Rare Diseases                        | 6     |      |      | T&A | Excluded | wrong topic        |
| <b>Motzkin B., Marion R., Goldberg R., Shprintzen R., Saenger P.</b>                                                          | Variable phenotypes in velocardiofacial syndrome with chromosomal deletion                                                                      | 1993 | The Journal of Pediatrics                                | 123   | 406  | 410  | FT  | Excluded | incomplete outcome |
| <b>Guo X., Delio M., Haque N., Castellanos R., Hestand M.S., Vermeesch J.R., Morrow B.E., Zheng D.</b>                        | Variant discovery and breakpoint region prediction for studying the human 22q11.2 deletion using BAC clone and whole genome sequencing analysis | 2015 | Human Molecular Genetics                                 | 25    | 3754 | 3767 | T&A | Excluded | wrong outcome      |

|                                                                                                                                                                                                                                                                                                                                                                                                                                                              |                                                                                                                                                                                                |      |                                                                    |     |      |      |     |          |                        |
|--------------------------------------------------------------------------------------------------------------------------------------------------------------------------------------------------------------------------------------------------------------------------------------------------------------------------------------------------------------------------------------------------------------------------------------------------------------|------------------------------------------------------------------------------------------------------------------------------------------------------------------------------------------------|------|--------------------------------------------------------------------|-----|------|------|-----|----------|------------------------|
| <b>Murphy K.C., Owen M.J.</b>                                                                                                                                                                                                                                                                                                                                                                                                                                | Velo-cardio-facial syndrome: A model for understanding the genetics and pathogenesis of schizophrenia                                                                                          | 2001 | British Journal of Psychiatry                                      | 179 | 397  | 402  | T&A | Excluded | wrong study design     |
| <b>Arnold P.D., Siegel-Bartelt J., Cytrynbaum C., Teshima I., Schachar R.</b>                                                                                                                                                                                                                                                                                                                                                                                | Velo-cardio-facial syndrome: Implications of microdeletion 22q11 for schizophrenia and mood disorders                                                                                          | 2001 | American Journal of Medical Genetics - Neuropsychiatric Genetics   | 105 | 354  | 362  | T&A | Excluded | wrong outcome          |
| <b>Sundram F., Murphy K.C.</b>                                                                                                                                                                                                                                                                                                                                                                                                                               | Velo-cardio-facial syndrome/22q11 deletion syndrome                                                                                                                                            | 2011 | The SAGE Handbook of Developmental Disorders                       |     | 219  | 238  | T&A | Excluded | wrong publication type |
| <b>Shashi V., Berry M.N.</b>                                                                                                                                                                                                                                                                                                                                                                                                                                 | Velocardiofacial syndrome (Chromosome 22q11.2 deletion syndrome) as a model of schizophrenia                                                                                                   | 2010 | Secondary Schizophrenia                                            |     | 309  | 327  | T&A | Excluded | wrong study design     |
| <b>Ellez S., Braissand V., Knauer O.</b>                                                                                                                                                                                                                                                                                                                                                                                                                     | Velocardiofacial syndrome (deletion 22q11.2): Literature review and case study [Le syndrome vélo-cardio-facial (délétion 22q11.2): Une revue de littérature et présentation d'un cas clinique] | 2004 | Schweizer Archiv fur Neurologie und Psychiatrie                    | 155 | 414  | 426  | T&A | Excluded | wrong study design     |
| <b>Usiskin S.I., Nicolson R., Krasnewich D.M., Yan W., Lenane M., Wudarsky M., Hamburger S.D., Rapoport J.L.</b>                                                                                                                                                                                                                                                                                                                                             | Velocardiofacial syndrome in childhood-onset schizophrenia                                                                                                                                     | 1999 | Journal of the American Academy of Child and Adolescent Psychiatry | 38  | 1536 | 1543 | T&A | Excluded | wrong outcome          |
| <b>Marquez-Avila C.S., Vizcaino-Aiarcon A., García-Delgado C., Núñez-Martínez P.M., Flores-Ramírez F., Reyes-de la Rosa A.D.P., Mendelsberg-Fishbein P., Ibarra-Grajeda D., Medina-Bravo P., Balderrábano-Saucedo N., Esteva-Solsona S., Márquez-Quiróz L.D.C., Flores-Cuevas A., Sánchez-Urbina R., Morales-Jiménez A.B., Garibay-Nieto N., Del Bosque-Garza J., Pietropaolo-Cienfuegos D., Gutiérrez-Camacho C., García-Morales L., Morán-Barroso V.F.</b> | Velocardiofacial syndrome in Mexican patients: Unusually high prevalence of congenital heart disease                                                                                           | 2015 | International Journal of Pediatric Otorhinolaryngology             | 79  | 1886 | 1891 | T&A | Excluded | wrong outcome          |

|                                                                                                                                                                      |                                                                                                                                                                                |      |                                                        |     |      |      |     |          |                    |
|----------------------------------------------------------------------------------------------------------------------------------------------------------------------|--------------------------------------------------------------------------------------------------------------------------------------------------------------------------------|------|--------------------------------------------------------|-----|------|------|-----|----------|--------------------|
| <b>Van Geet C., Devriendt K., Eyskens B., Vermeylen J., Hoylaerts M.F.</b>                                                                                           | Velocardiofacial syndrome patients with a heterozygous chromosome 22q11 deletion <u>have giant platelets</u>                                                                   | 1998 | Pediatric Research                                     | 44  | 607  | 611  | T&A | Excluded | wrong outcome      |
| <b>Eliez S., Blasey C.M., Schmitt E.J., White C.D., Hu D., Reiss A.L.</b>                                                                                            | Velocardiofacial syndrome: Are structural changes in the temporal and mesial temporal regions related to schizophrenia?                                                        | 2001 | American Journal of Psychiatry                         | 158 | 447  | 453  | T&A | Excluded | wrong outcome      |
| <b>Ruotolo R.A., Veitia N.A., Corbin A., McDonough J., Solot C.B., McDonald-McGinn D., Zackai E.H., Emanuel B.S., Cnaan A., LaRossa D., Arens R., Kirschner R.E.</b> | Velopharyngeal anatomy in 22q11.2 deletion syndrome: A three-dimensional cephalometric analysis                                                                                | 2006 | Cleft Palate-Craniofacial Journal                      | 43  | 446  | 456  | T&A | Excluded | wrong outcome      |
| <b>Havkin N., Tatum S.A., III, Shprintzen R.J.</b>                                                                                                                   | Velopharyngeal insufficiency and articulation impairment in velo-cardio- facial syndrome: The influence of adenoids on <u>phonemic development</u>                             | 2000 | International Journal of Pediatric Otorhinolaryngology | 54  | 103  | 110  | T&A | Excluded | wrong outcome      |
| <b>Ysunza A., Carmen Pamplona M., Santiago Morales M.A.</b>                                                                                                          | Velopharyngeal valving during speech, in patients with velocardiofacial syndrome and patients with non-syndromic palatal clefts after surgical and speech pathology management | 2011 | International Journal of Pediatric Otorhinolaryngology | 75  | 1255 | 1259 | FT  | Excluded | incomplete outcome |
| <b>Simon T.J., Bearden C.E., McDonald McGinn D., Zackai E.</b>                                                                                                       | Visuospatial and numerical cognitive deficits in children with chromosome 22q11.2 deletion syndrome                                                                            | 2005 | Cortex                                                 | 41  | 145  | 155  | T&A | Excluded | wrong outcome      |
| <b>Simon T.J., Ding L., Bish J.P., McDonald-McGinn D.M., Zackai E.H., Gee J.</b>                                                                                     | Volumetric, connective, and morphologic changes in the brains of children with chromosome 22q11.2 deletion syndrome: An integrative study                                      | 2005 | NeuroImage                                             | 25  | 169  | 180  | T&A | Excluded | wrong outcome      |

|                                                                                                                                                                                                                           |                                                                                                                                                                      |      |                                         |     |      |      |     |          |                        |
|---------------------------------------------------------------------------------------------------------------------------------------------------------------------------------------------------------------------------|----------------------------------------------------------------------------------------------------------------------------------------------------------------------|------|-----------------------------------------|-----|------|------|-----|----------|------------------------|
| <b>Voormolen E.H.J., Wei C., Chow E.W.C., Bassett A.S., Mikulis D.J., Crawley A.P.</b>                                                                                                                                    | Voxel-based morphometry and automated lobar volumetry: The trade-off between spatial scale and statistical correction                                                | 2010 | NeuroImage                              | 49  | 587  | 596  | T&A | Excluded | wrong topic            |
| <b>Owen M.J., Doherty J.L.</b>                                                                                                                                                                                            | What can we learn from the high rates of schizophrenia in people with 22q11.2 deletion syndrome?                                                                     | 2016 | World Psychiatry                        | 15  | 23   | 25   | T&A | Excluded | wrong publication type |
| <b>Da Silva Alves F., Schmitz N., Bloemen O., van der Meer J., Meijer J., Boot E., Nederveen A., de Haan L., Linszen D., van Amelsvoort T.</b>                                                                            | White matter abnormalities in adults with 22q11 deletion syndrome with and without schizophrenia                                                                     | 2011 | Schizophrenia Research                  | 132 | 75   | 83   | T&A | Excluded | wrong outcome          |
| <b>Villalon-Reina J., Jahanshad N., Beaton E., Toga A.W., Thompson P.M., Simon T.J.</b>                                                                                                                                   | White matter microstructural abnormalities in girls with chromosome 22q11.2 deletion syndrome, Fragile X or Turner syndrome as evidenced by diffusion tensor imaging | 2013 | NeuroImage                              | 81  | 441  | 454  | T&A | Excluded | wrong outcome          |
| <b>Sundram F., Campbell L.E., Azuma R., Daly E., Bloemen O.J.N., Barker G.J., Chitnis X., Jones D.K., van Amelsvoort T., Murphy K.C., Murphy D.G.M.</b>                                                                   | White matter microstructure in 22q11 deletion syndrome: A pilot diffusion tensor imaging and voxel-based morphometry study of children and adolescents               | 2010 | Journal of Neurodevelopmental Disorders | 2   | 77   | 92   | T&A | Excluded | wrong outcome          |
| <b>Merico D., Zarrei M., Costain G., Ogura L., Alipanahi B., Gazzellone M.J., Butcher N.J., Thiruvahindrapuram B., Nalpathamkalam T., Chow E.W.C., Andrade D.M., Frey B.J., Marshall C.R., Scherer S.W., Bassett A.S.</b> | Whole-genome sequencing suggests schizophrenia risk mechanisms in humans with 22q11.2 deletion syndrome                                                              | 2015 | G3: Genes, Genomes, Genetics            | 5   | 2453 | 2461 | T&A | Excluded | wrong outcome          |
| <b>Tassabehji M.</b>                                                                                                                                                                                                      | Williams-Beuren syndrome: A challenge for genotype-phenotype correlations                                                                                            | 2003 | Human Molecular Genetics                | 12  | R229 | R237 | T&A | Excluded | wrong topic            |
| <b>Kurahashi H, Tsuda E, Kohama R, Nakayama T, Masuno M, Imaizumi K, Kamiya T, Sano T, Okada S, Nishisho I</b>                                                                                                            | Another Critical Region for Deletion of 22q11: A Study of 100 Patients                                                                                               | 1997 | American Journal of Medical Genetics    | 72  | 180  | 185  | FT  | Included |                        |

|                                                                                                                         |                                                                                       |      |                                    |    |     |     |    |          |  |
|-------------------------------------------------------------------------------------------------------------------------|---------------------------------------------------------------------------------------|------|------------------------------------|----|-----|-----|----|----------|--|
| <b>Carlson C, Papolos D, Pandita R. K, Faedda G. L, Veit S, Goldberg R, Shprintzen R, Kucherlapati R, and Morrow B.</b> | Molecular Analysis of Velo-Cardio-Facial Syndrome Patients with Psychiatric Disorders | 1997 | American Journal of Human Genetics | 60 | 851 | 857 | FT | Included |  |
|-------------------------------------------------------------------------------------------------------------------------|---------------------------------------------------------------------------------------|------|------------------------------------|----|-----|-----|----|----------|--|

\*FT : Full text  
\*T&A: Title and abstract
