# Supplementary material for: Association between phenotype and deletion size in 22q11.2 microdeletion syndrome: systematic review and meta-analysis
Source: Springer Nature journal article supplement (doi:10.1186/s13023-019-1170-x), 2019-08-09
Supplement: MOESM2 [file 17054286]

| Study                             | Deletion size | CHD         |                | PA          |                |
|-----------------------------------|---------------|-------------|----------------|-------------|----------------|
|                                   |               | <i>with</i> | <i>without</i> | <i>with</i> | <i>without</i> |
| KURAHASHI<br>(n=48)               | <i>AB</i>     | 4           | 1              | 5           | 0              |
|                                   | <i>AC</i>     | 0           | 0              | 0           | 0              |
|                                   | <i>AD</i>     | 41          | 2              | 10          | 33             |
|                                   | <i>Total</i>  | 48          |                | 48          |                |
| CARLSON<br>(n=23)                 | <i>AB</i>     | 5           | 5              | 10          | 0              |
|                                   | <i>AC</i>     | 0           | 0              | 0           | 0              |
|                                   | <i>AD</i>     | 9           | 4              | 13          | 0              |
|                                   | <i>Total</i>  | 23          |                | 23          |                |
| FERNANDEZ<br>(CHD n=14 ; PA=12)   | <i>AB</i>     | 4           | 3              | 6           | 0              |
|                                   | <i>AC</i>     |             |                |             |                |
|                                   | <i>AD</i>     | 3           | 4              | 6           | 0              |
|                                   | <i>Total</i>  | 14          |                | 12          |                |
| MICHAELOVSKY<br>(n=105)           | <i>AB</i>     | 1           | 3              | 3           | 1              |
|                                   | <i>AC</i>     | 3           | 1              | 3           | 1              |
|                                   | <i>AD</i>     | 67          | 30             | 80          | 17             |
|                                   | <i>Total</i>  | 105         |                | 105         |                |
| WU<br>(n=43)                      | <i>AB</i>     | 0           | 3              | -           | -              |
|                                   | <i>AC</i>     | -           | -              | -           | -              |
|                                   | <i>AD</i>     | 10          | 30             | -           | -              |
|                                   | <i>Total</i>  | 43          |                | 0           |                |
| MONTEIRO<br>(n=39)                | <i>AB</i>     | 0           | 3              | 3           | 0              |
|                                   | <i>AC</i>     | -           | -              | -           | -              |
|                                   | <i>AD</i>     | 23          | 13             | 32          | 4              |
|                                   | <i>Total</i>  | 39          |                | 39          |                |
| HWANG<br>(n=77)                   | <i>AB</i>     | 1           | 2              | -           | -              |
|                                   | <i>AC</i>     | -           | -              | -           | -              |
|                                   | <i>AD</i>     | 36          | 38             | -           | -              |
|                                   | <i>Total</i>  | 77          |                | 0           |                |
| MLYNARSKI<br>(n=949)              | <i>AB</i>     | 29          | 13             | -           | -              |
|                                   | <i>AC</i>     | 10          | 5              | -           | -              |
|                                   | <i>AD</i>     | 564         | 328            | -           | -              |
|                                   | <i>Total</i>  | 949         |                | 0           |                |
| REPETTO<br>(CHD n=216 ; PA n=217) | <i>AB</i>     | 3           | 8              | 8           | 4              |
|                                   | <i>AC</i>     | 3           | 2              | 4           | 1              |
|                                   | <i>AD</i>     | 118         | 82             | 140         | 60             |
|                                   | <i>Total</i>  | 216         |                | 217         |                |
